# Supplementary material for: Stepwise visualization of membrane pore formation by suilysin, a bacterial cholesterol-dependent cytolysin
Source: eLife journal article supplement (doi:10.7554/elife.04247), 2014-12-02
Supplement: supp [file elife-04247-supp-v1.zip]

Archive with 11 entries (11 files):
- elife_poa_e04247_Figure_1_figure_supplement_1.pdf
- elife_poa_e04247_Figure_4_figure_supplement_2.pdf
- elife_poa_e04247_Video_1.wmv
- elife_poa_e04247_Figure_4_figure_supplement_1.pdf
- elife_poa_e04247_Figure_3_figure_supplement_1.pdf
- elife_poa_e04247_Figure_1_figure_supplement_4.pdf
- elife_poa_e04247_Figure_2_figure_supplement_1.pdf
- elife_poa_e04247_Figure_1_figure_supplement_2.pdf
- elife_poa_e04247_Figure_5_figure_supplement_1.pdf
- elife_poa_e04247_Figure_4_figure_supplement_3.pdf
- elife_poa_e04247_Figure_1_figure_supplement_3.pdf
