# Supplementary figures and images for: Stepwise visualization of membrane pore formation by suilysin, a bacterial cholesterol-dependent cytolysin
Source: eLife journal article supplement (doi:10.7554/elife.04247), 2014-12-02

**A**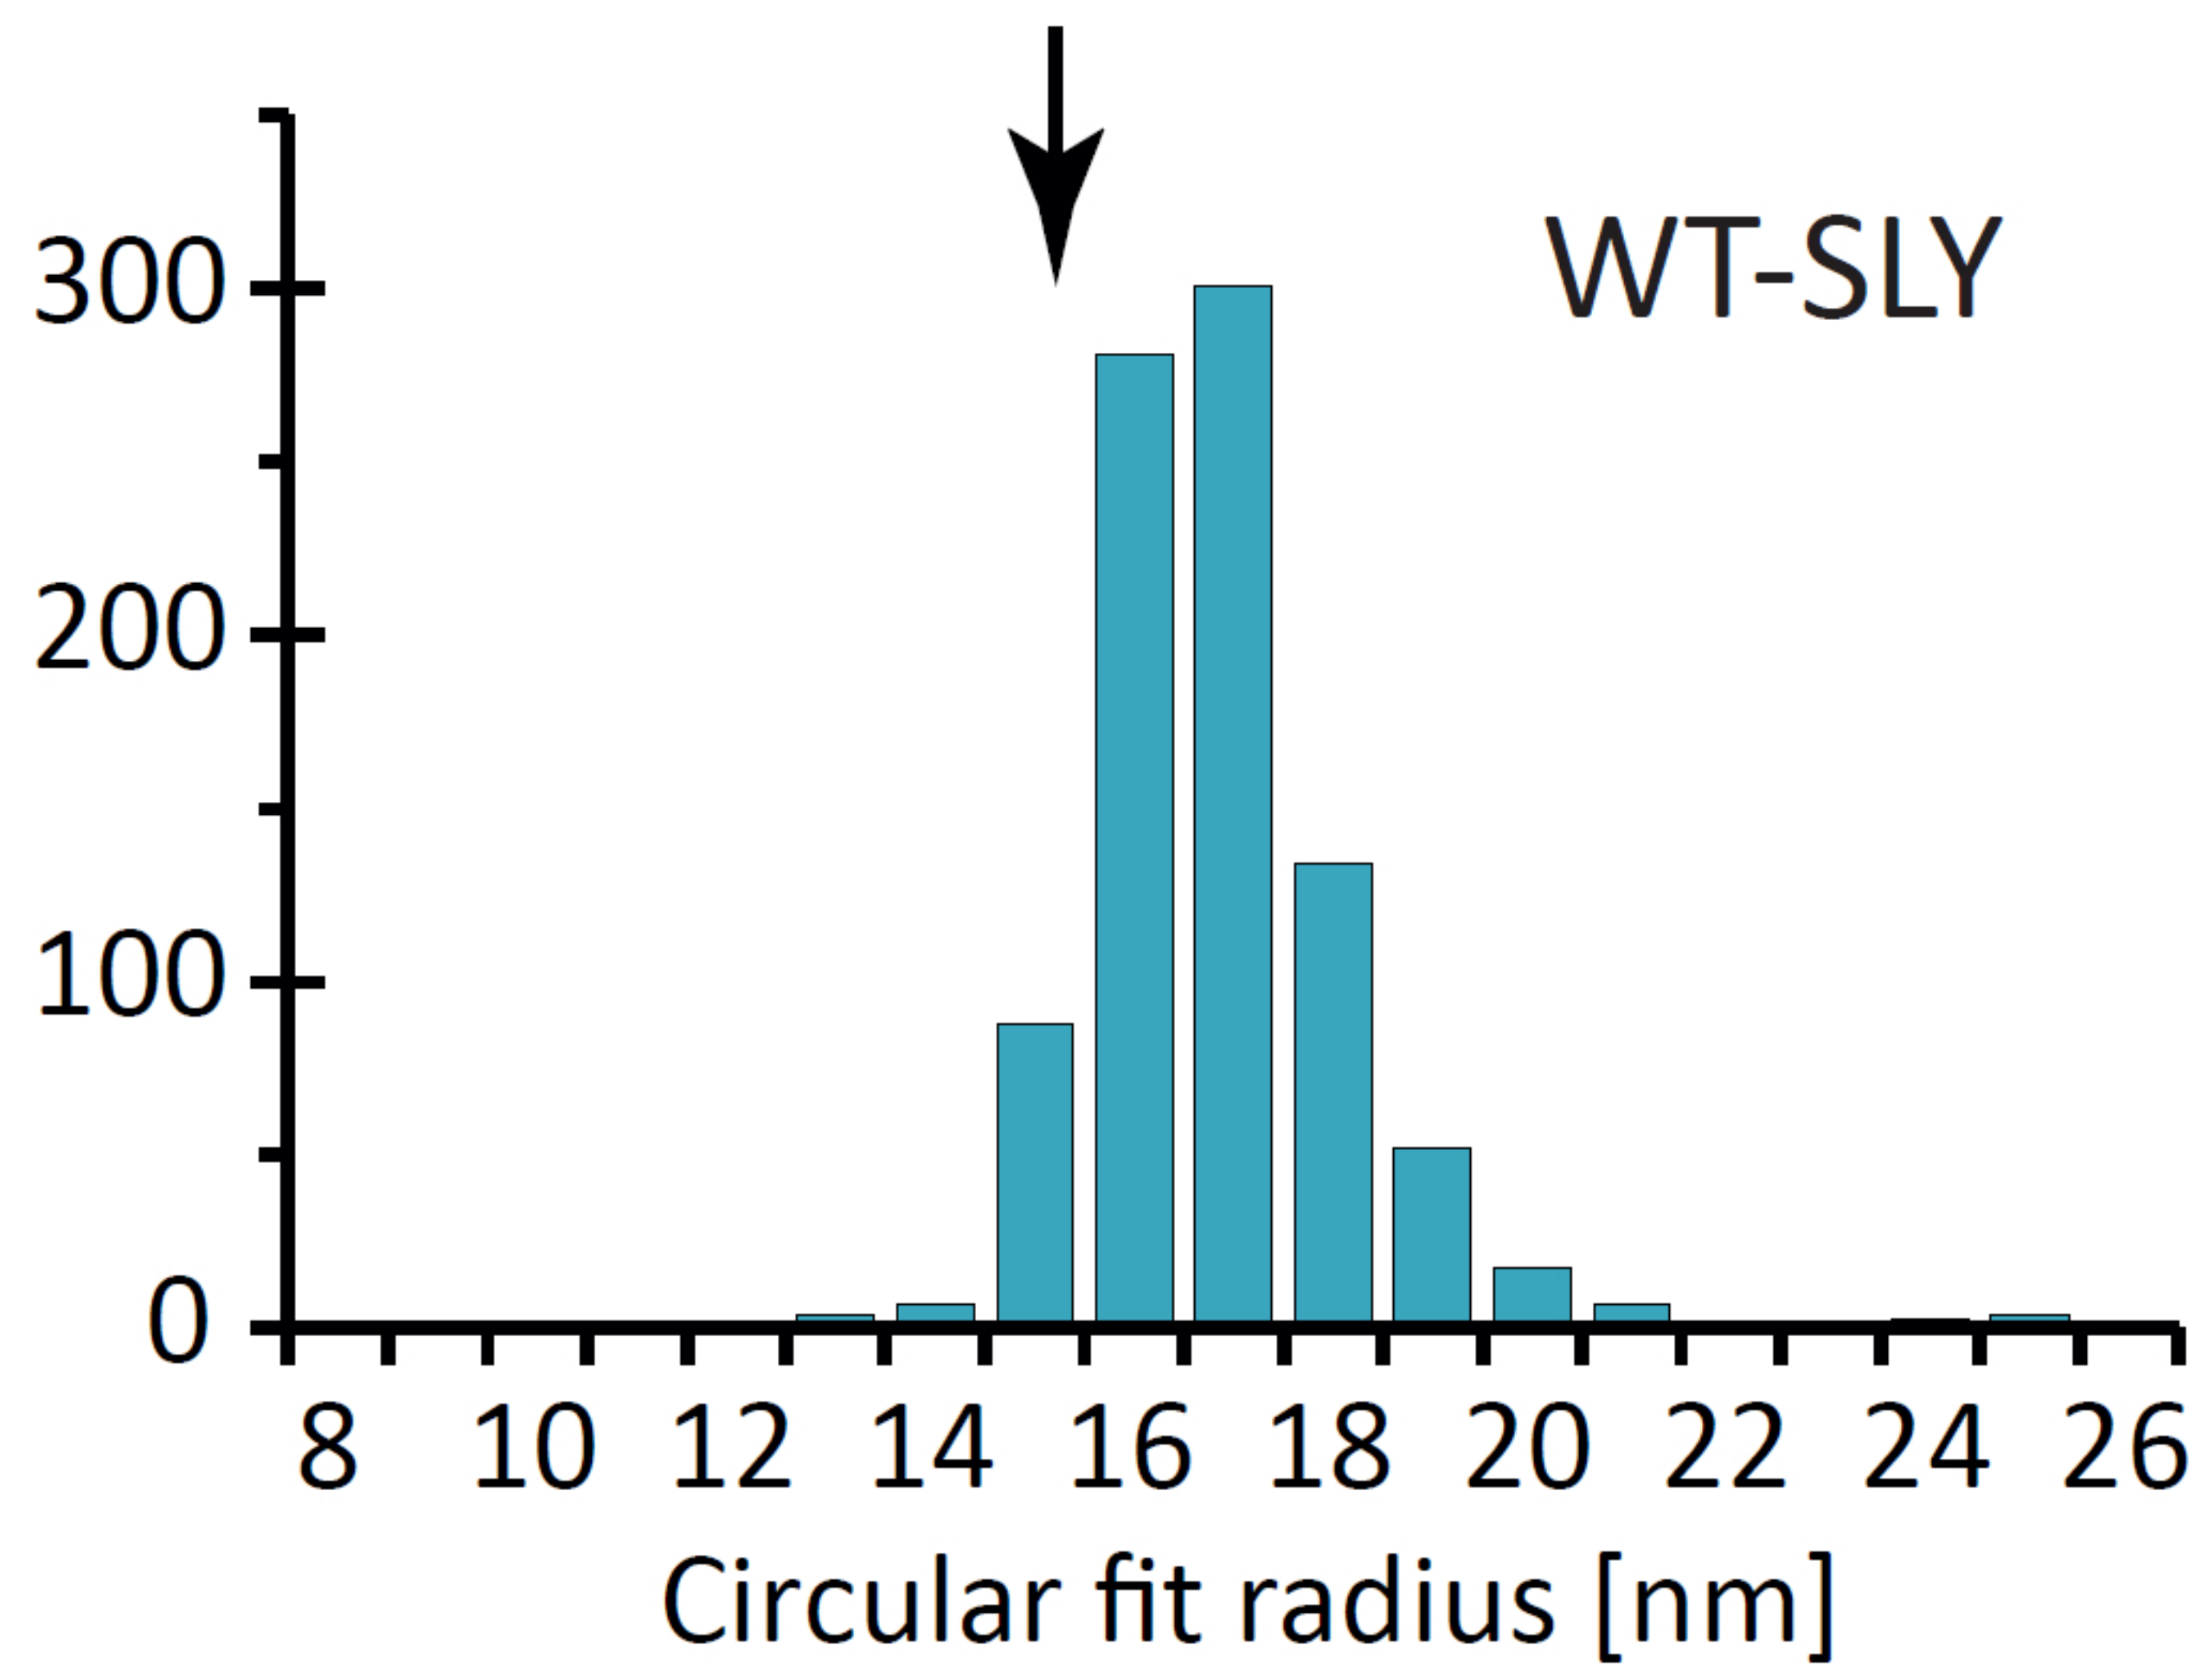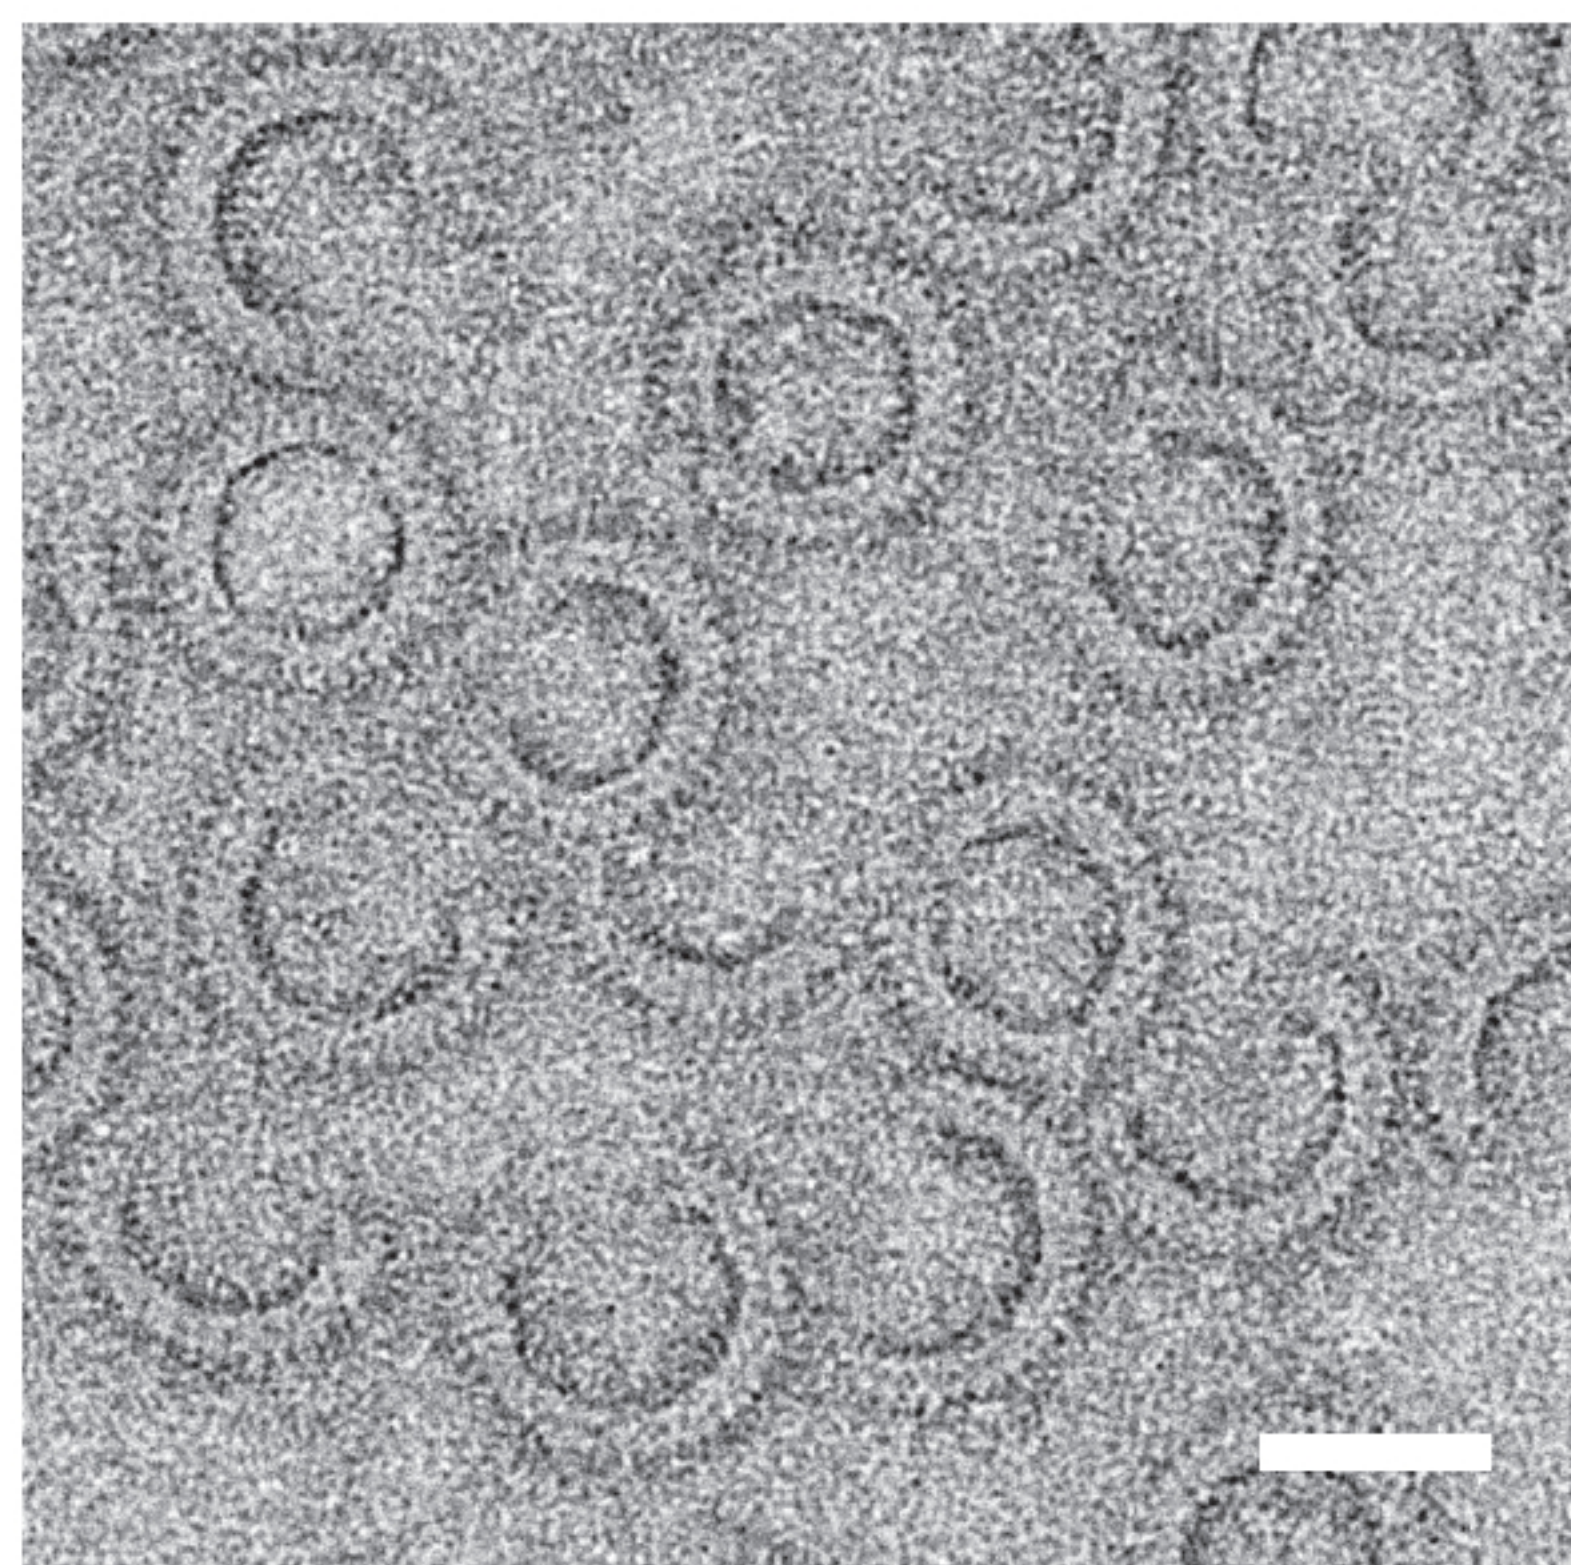**B**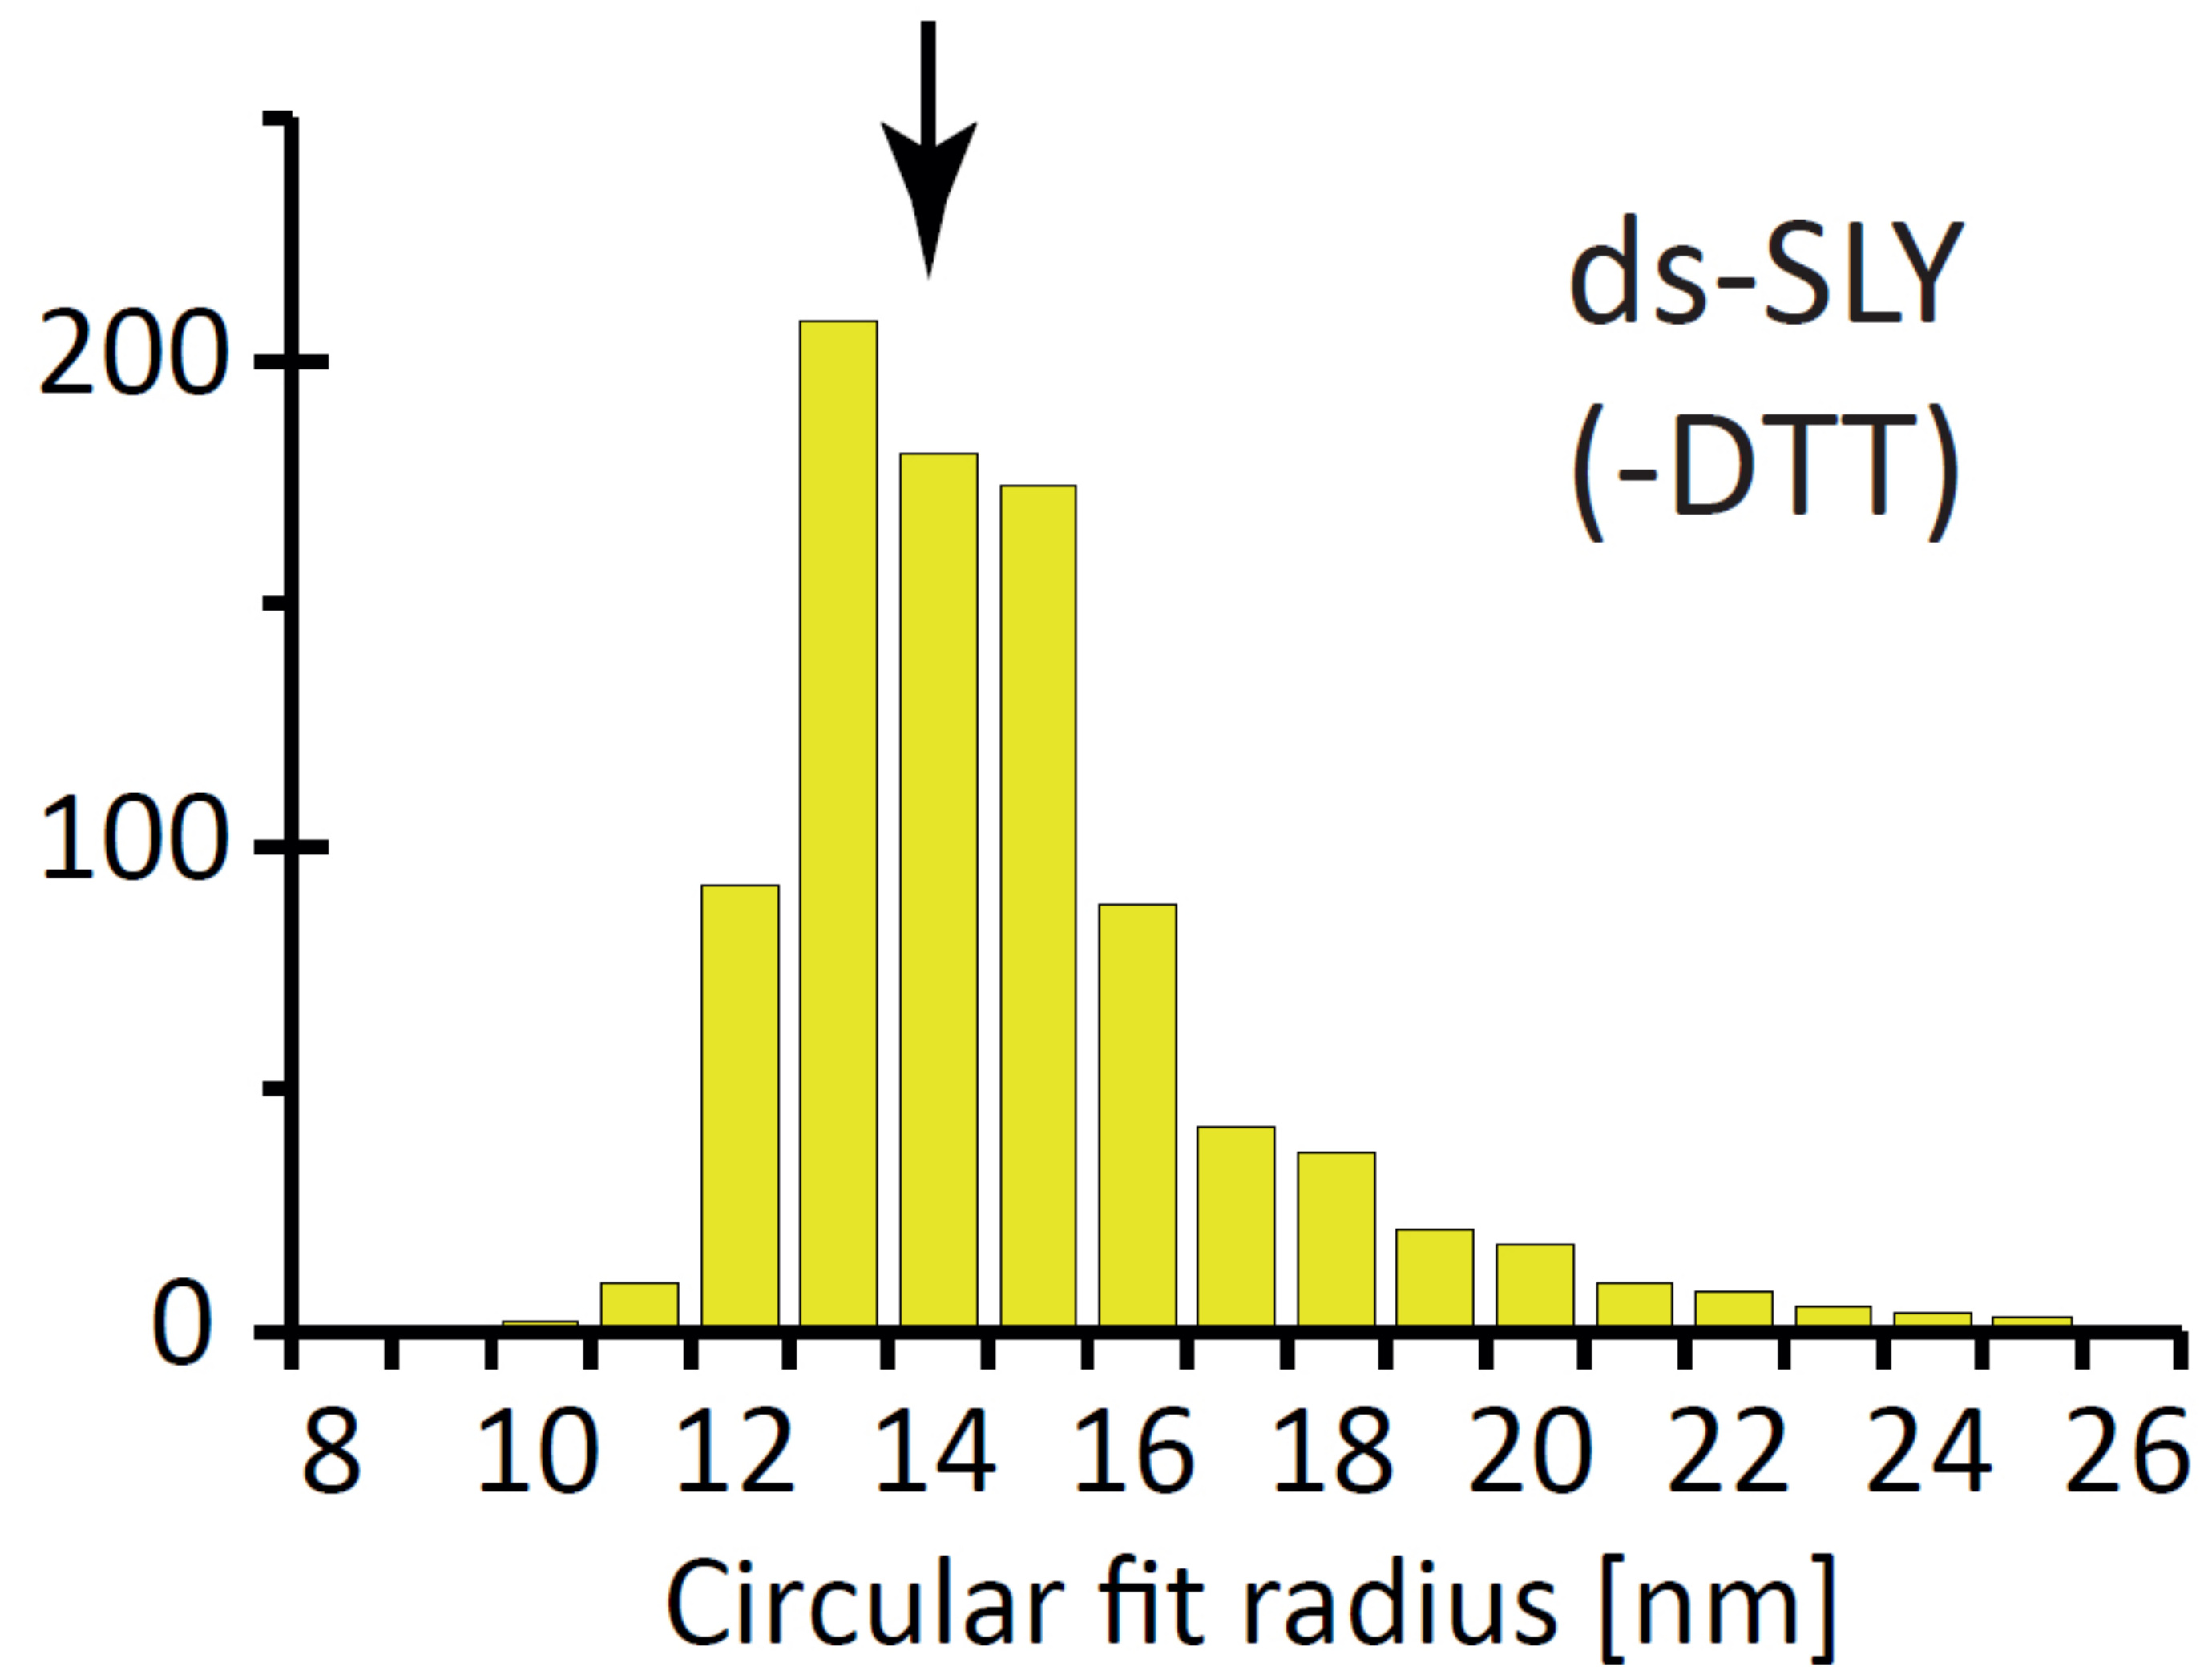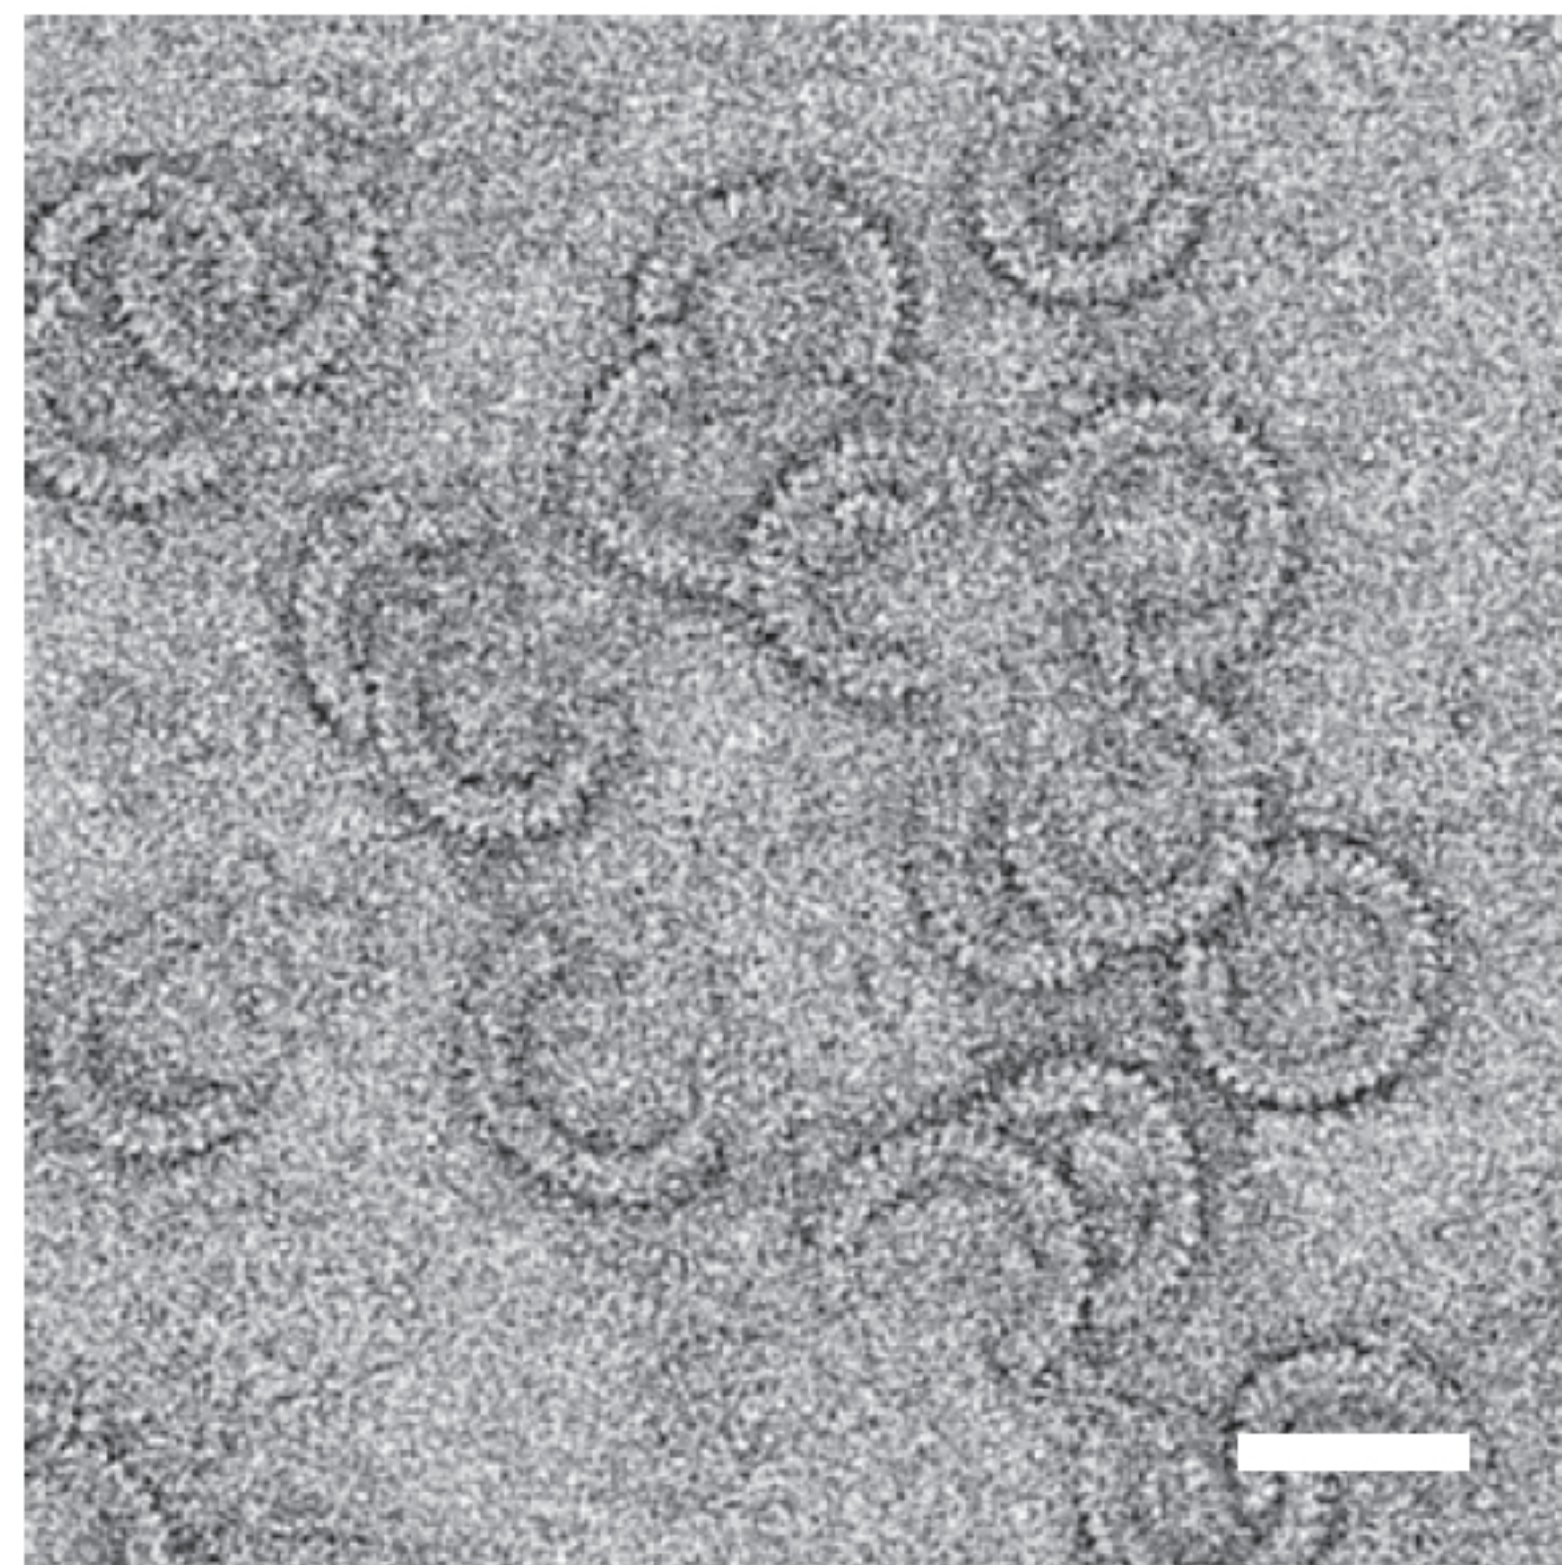**C**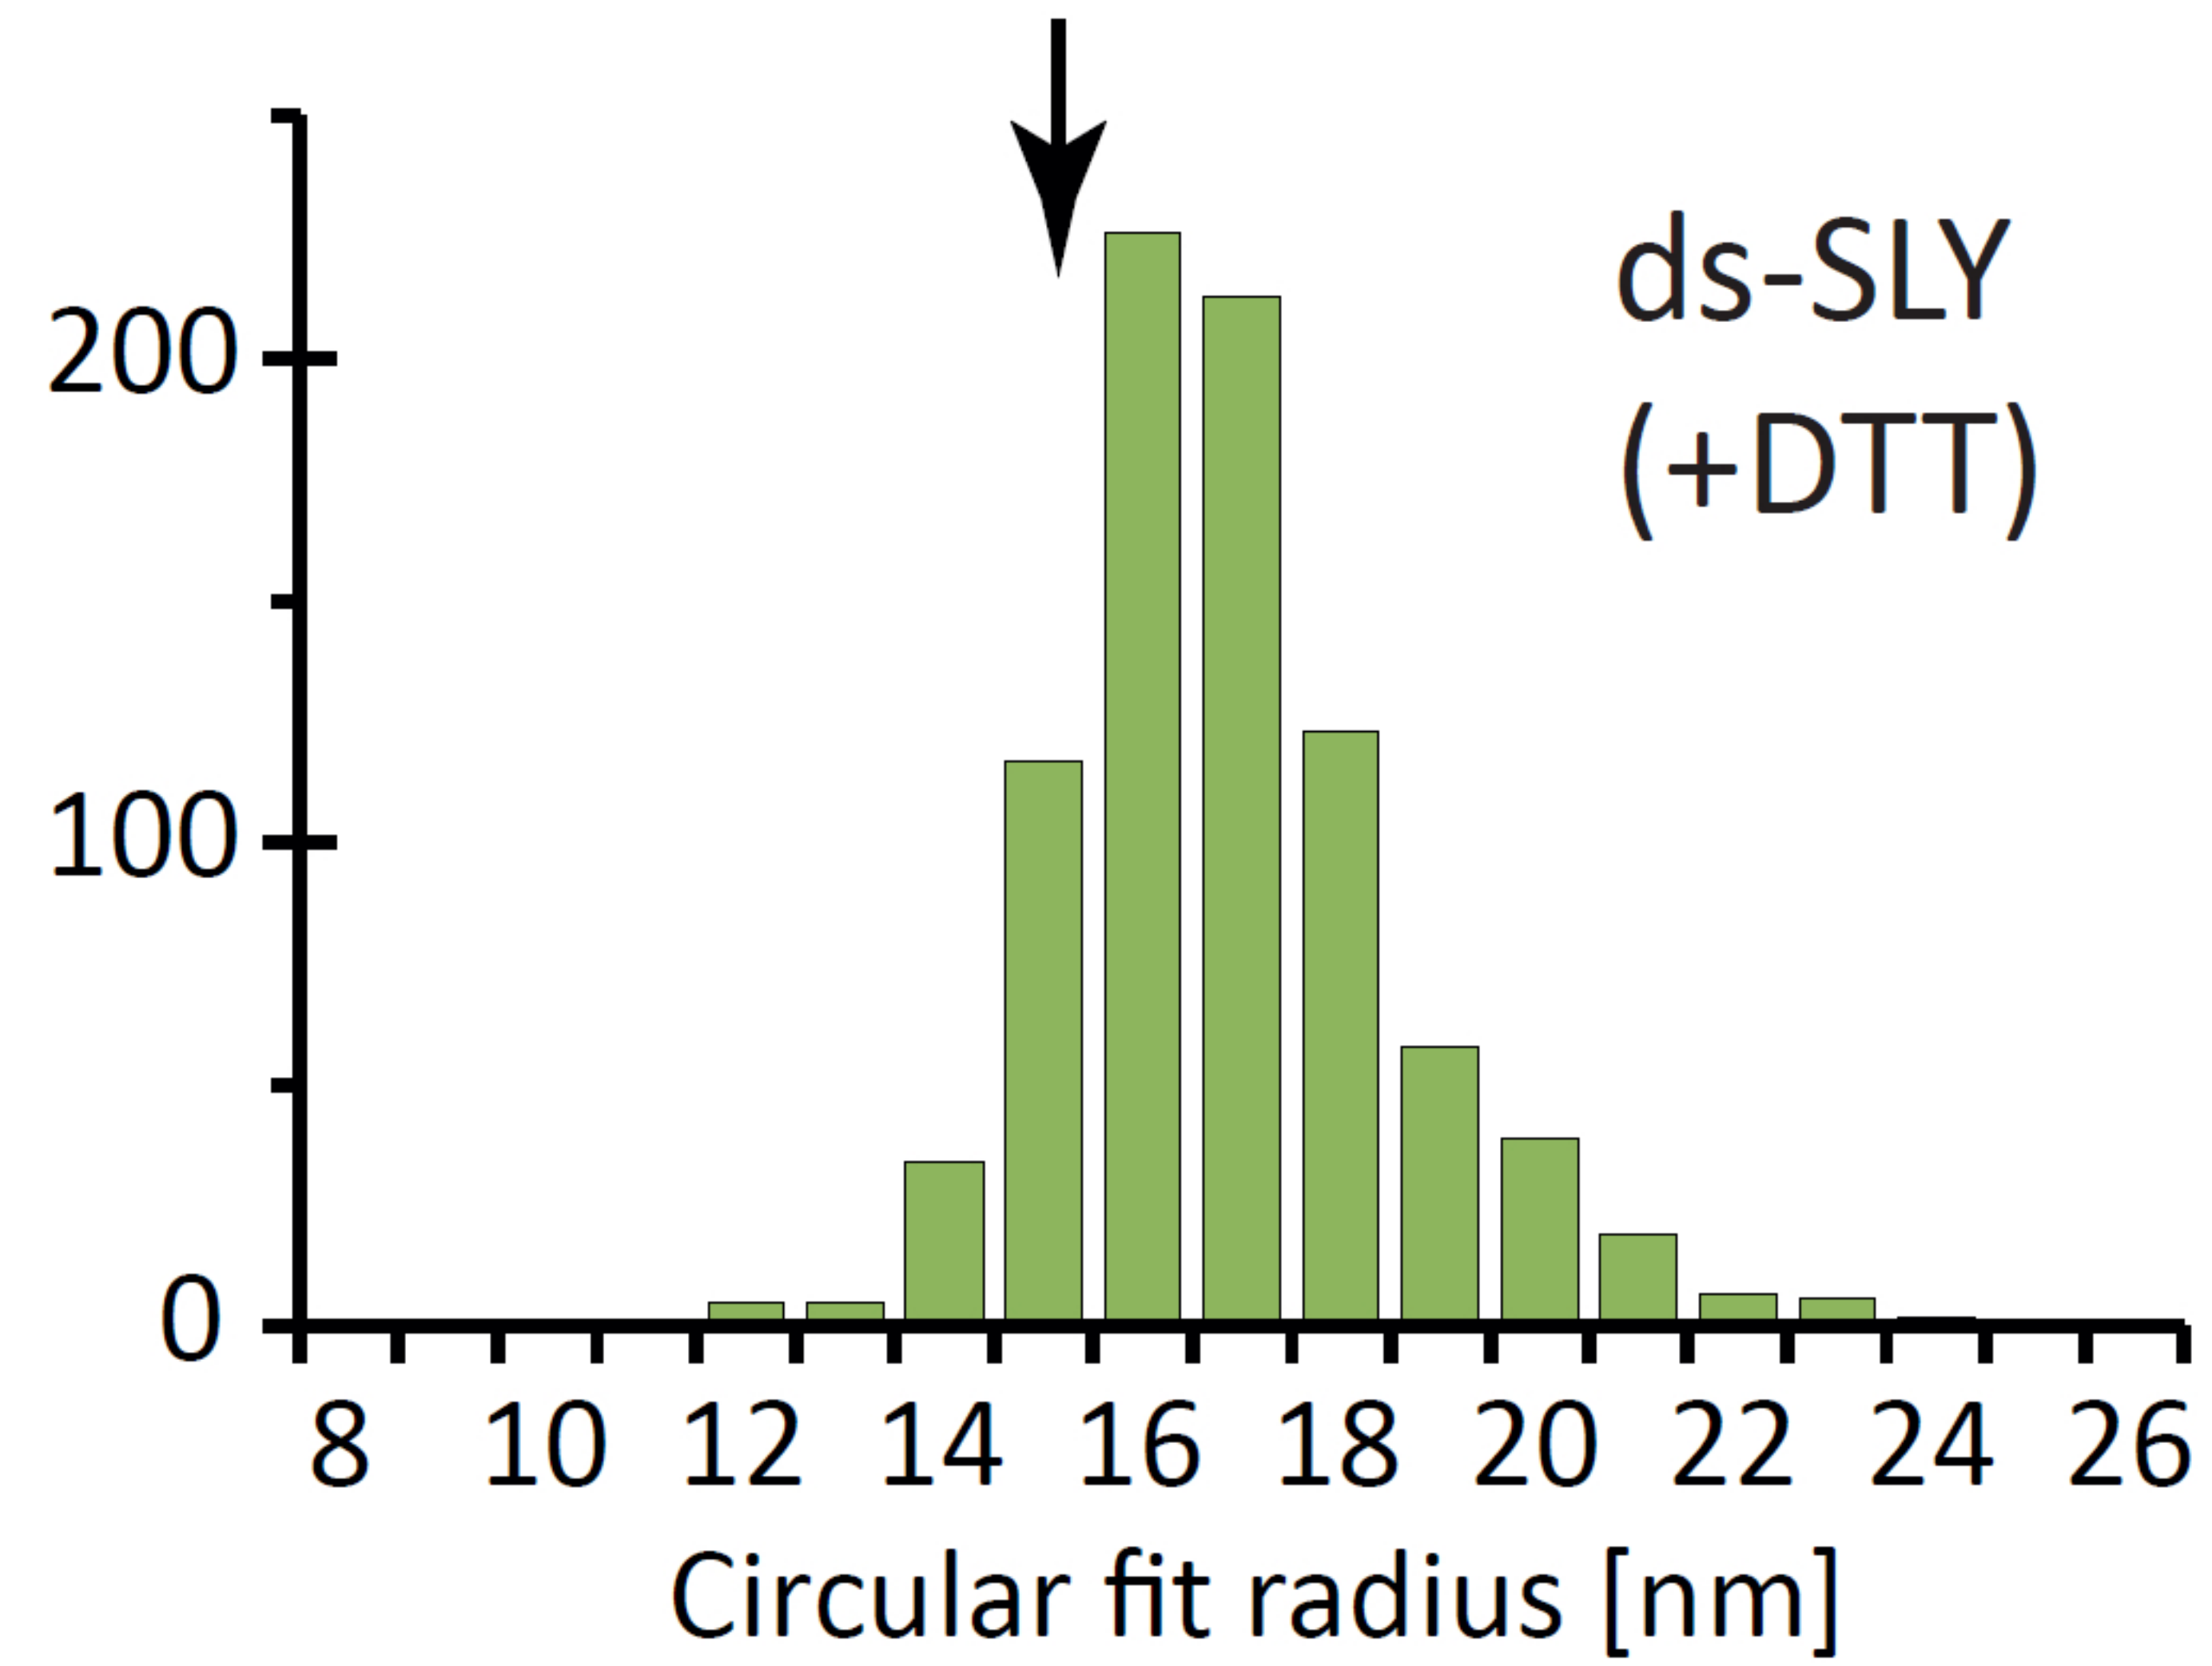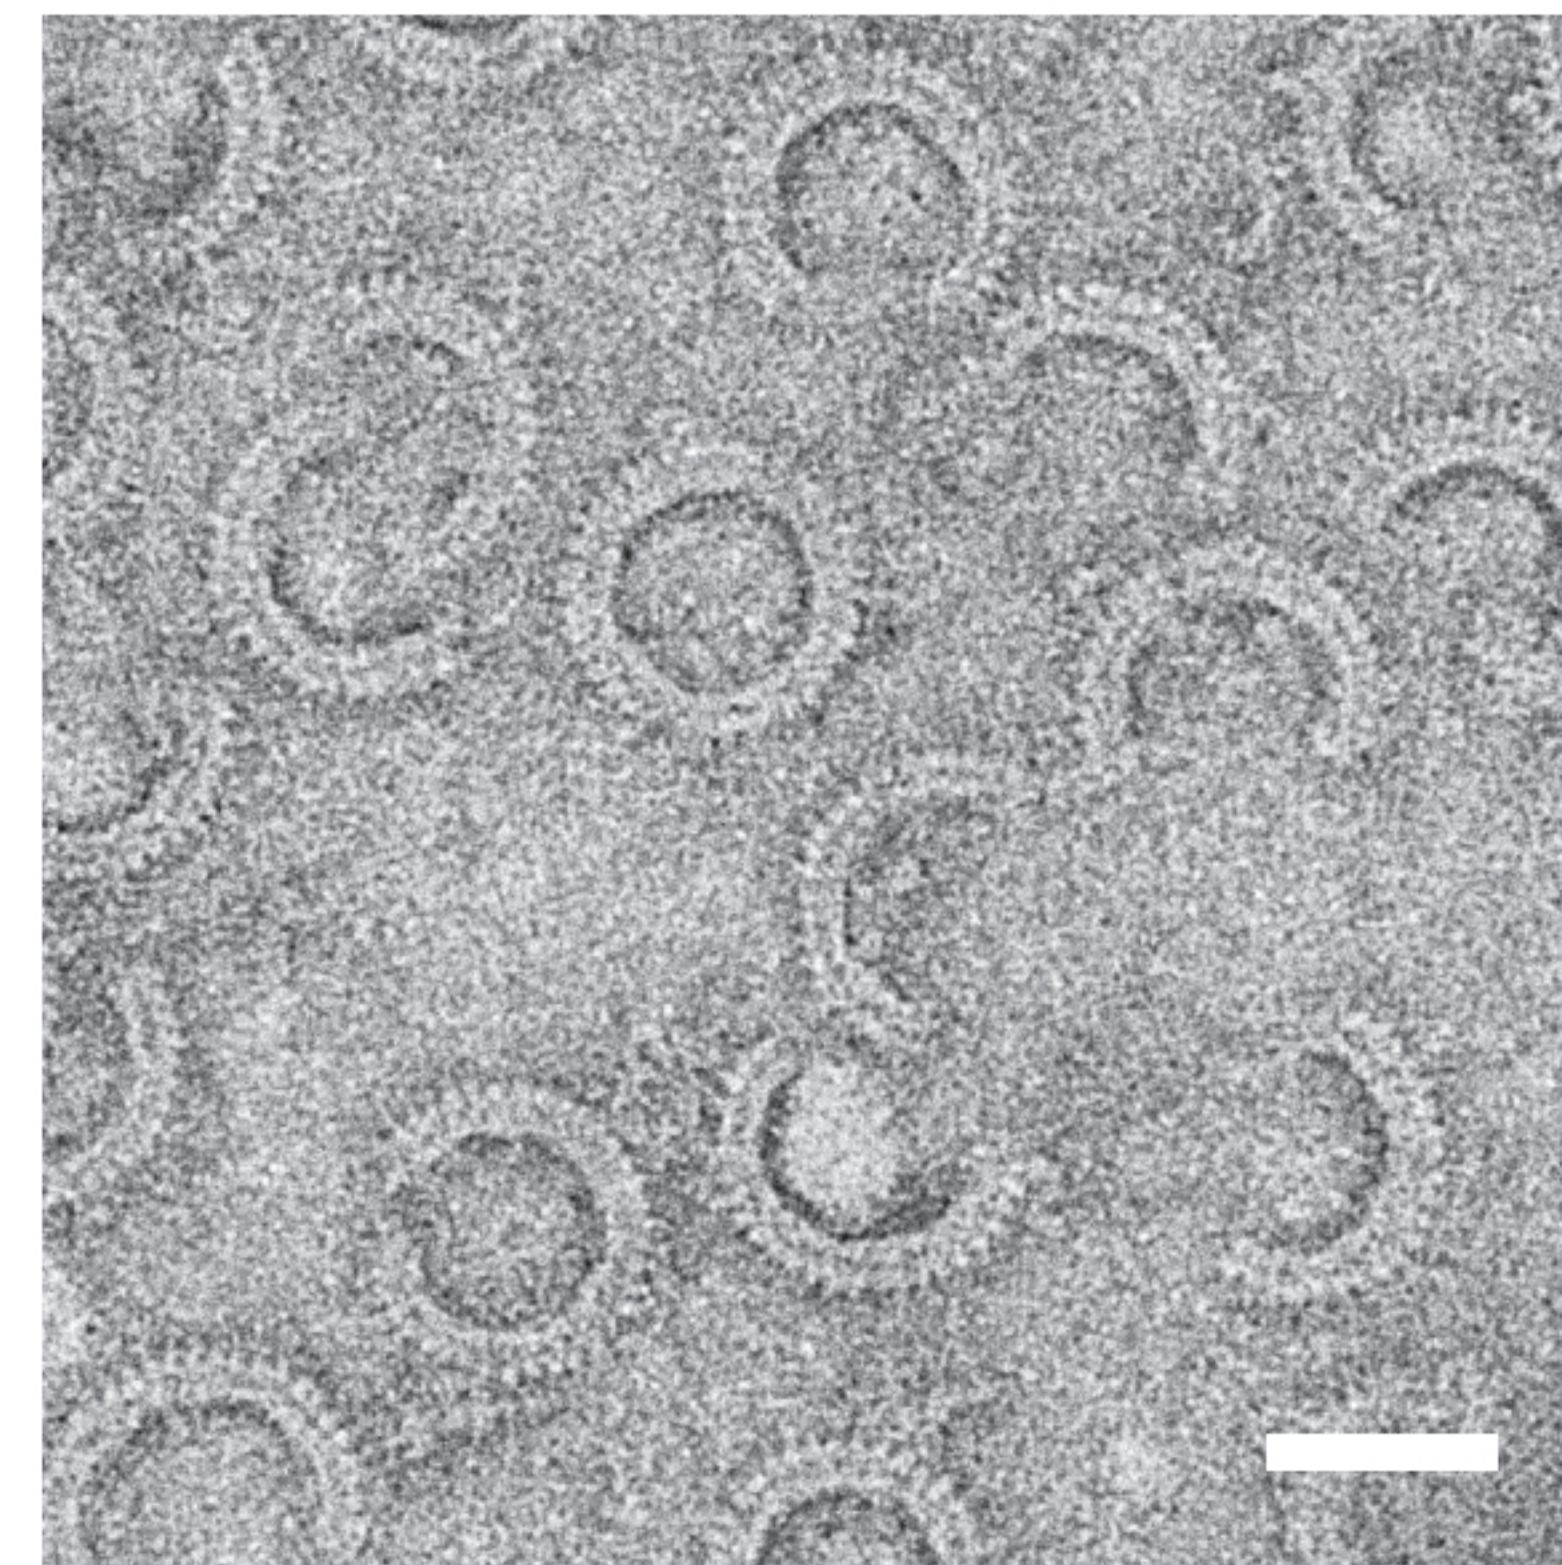

Supplement: supp [file elife-04247-supp-v1.zip]

**A****Prepores**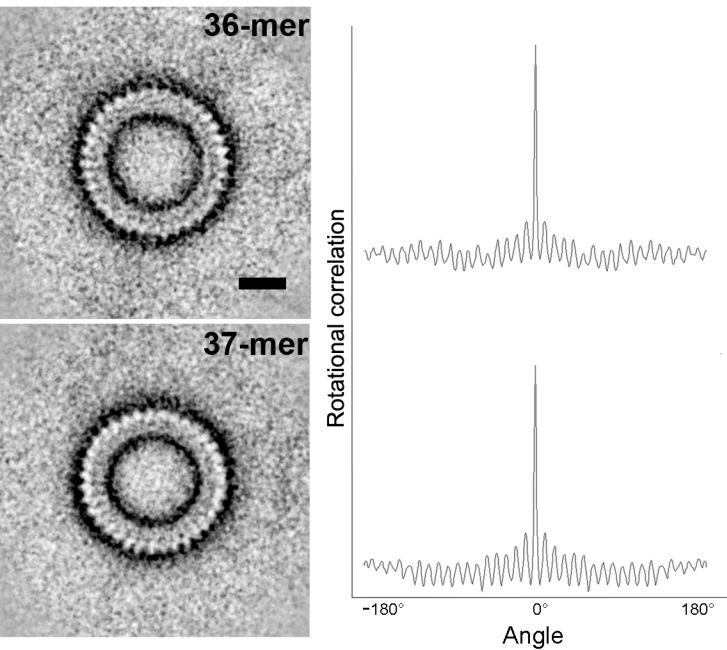**B****Pores**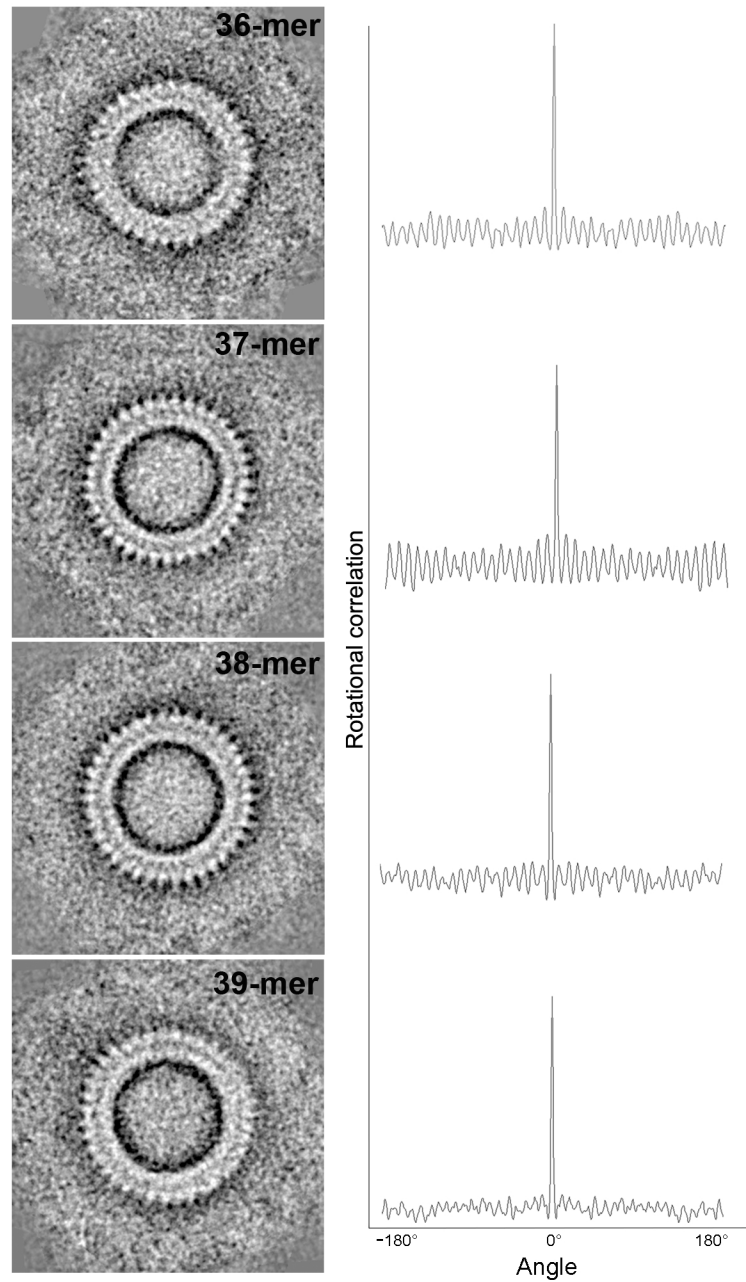**C**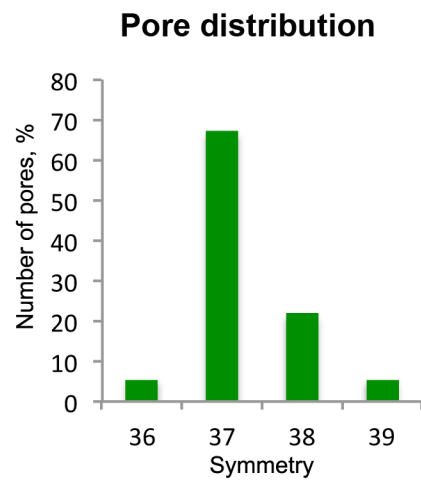

Supplement: supp [file elife-04247-supp-v1.zip › elife_poa_e04247_Figure_1_figure_supplement_1.pdf]

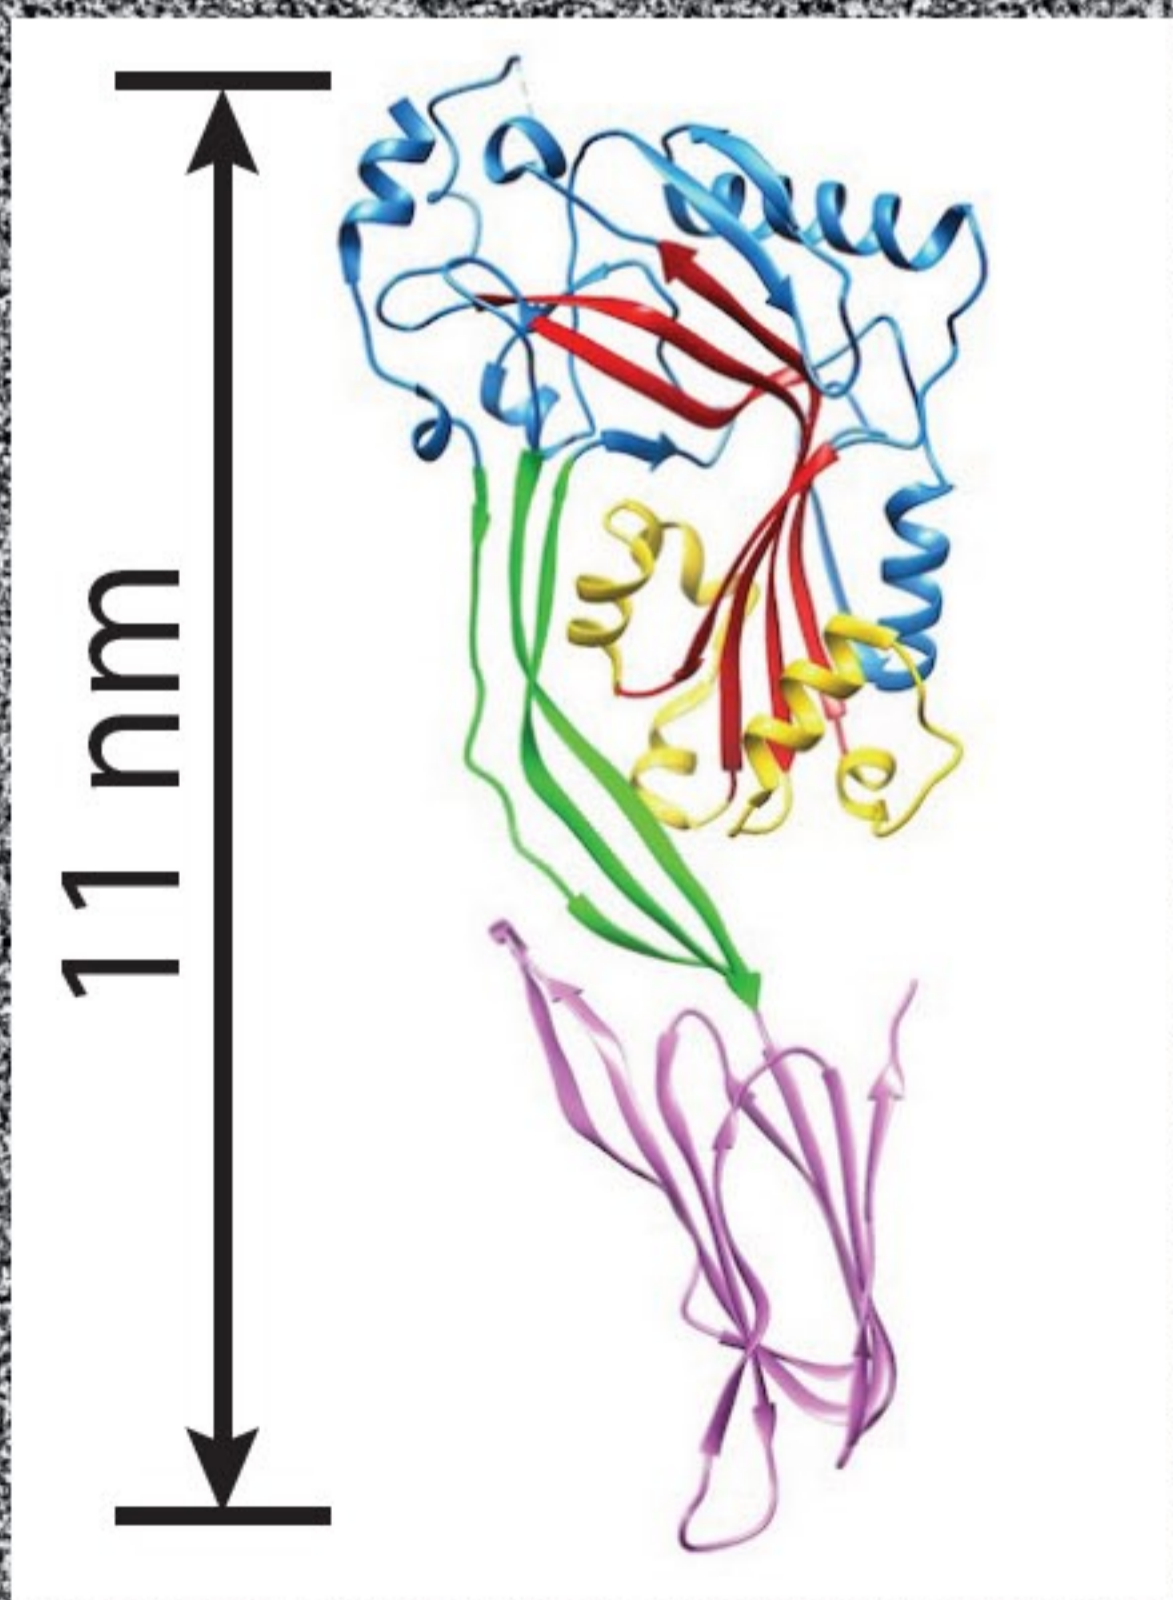

20 nm

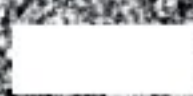

A horizontal white scale bar representing 20 nm.

Supplement: supp [file elife-04247-supp-v1.zip › elife_poa_e04247_Figure_4_figure_supplement_2.pdf]

A

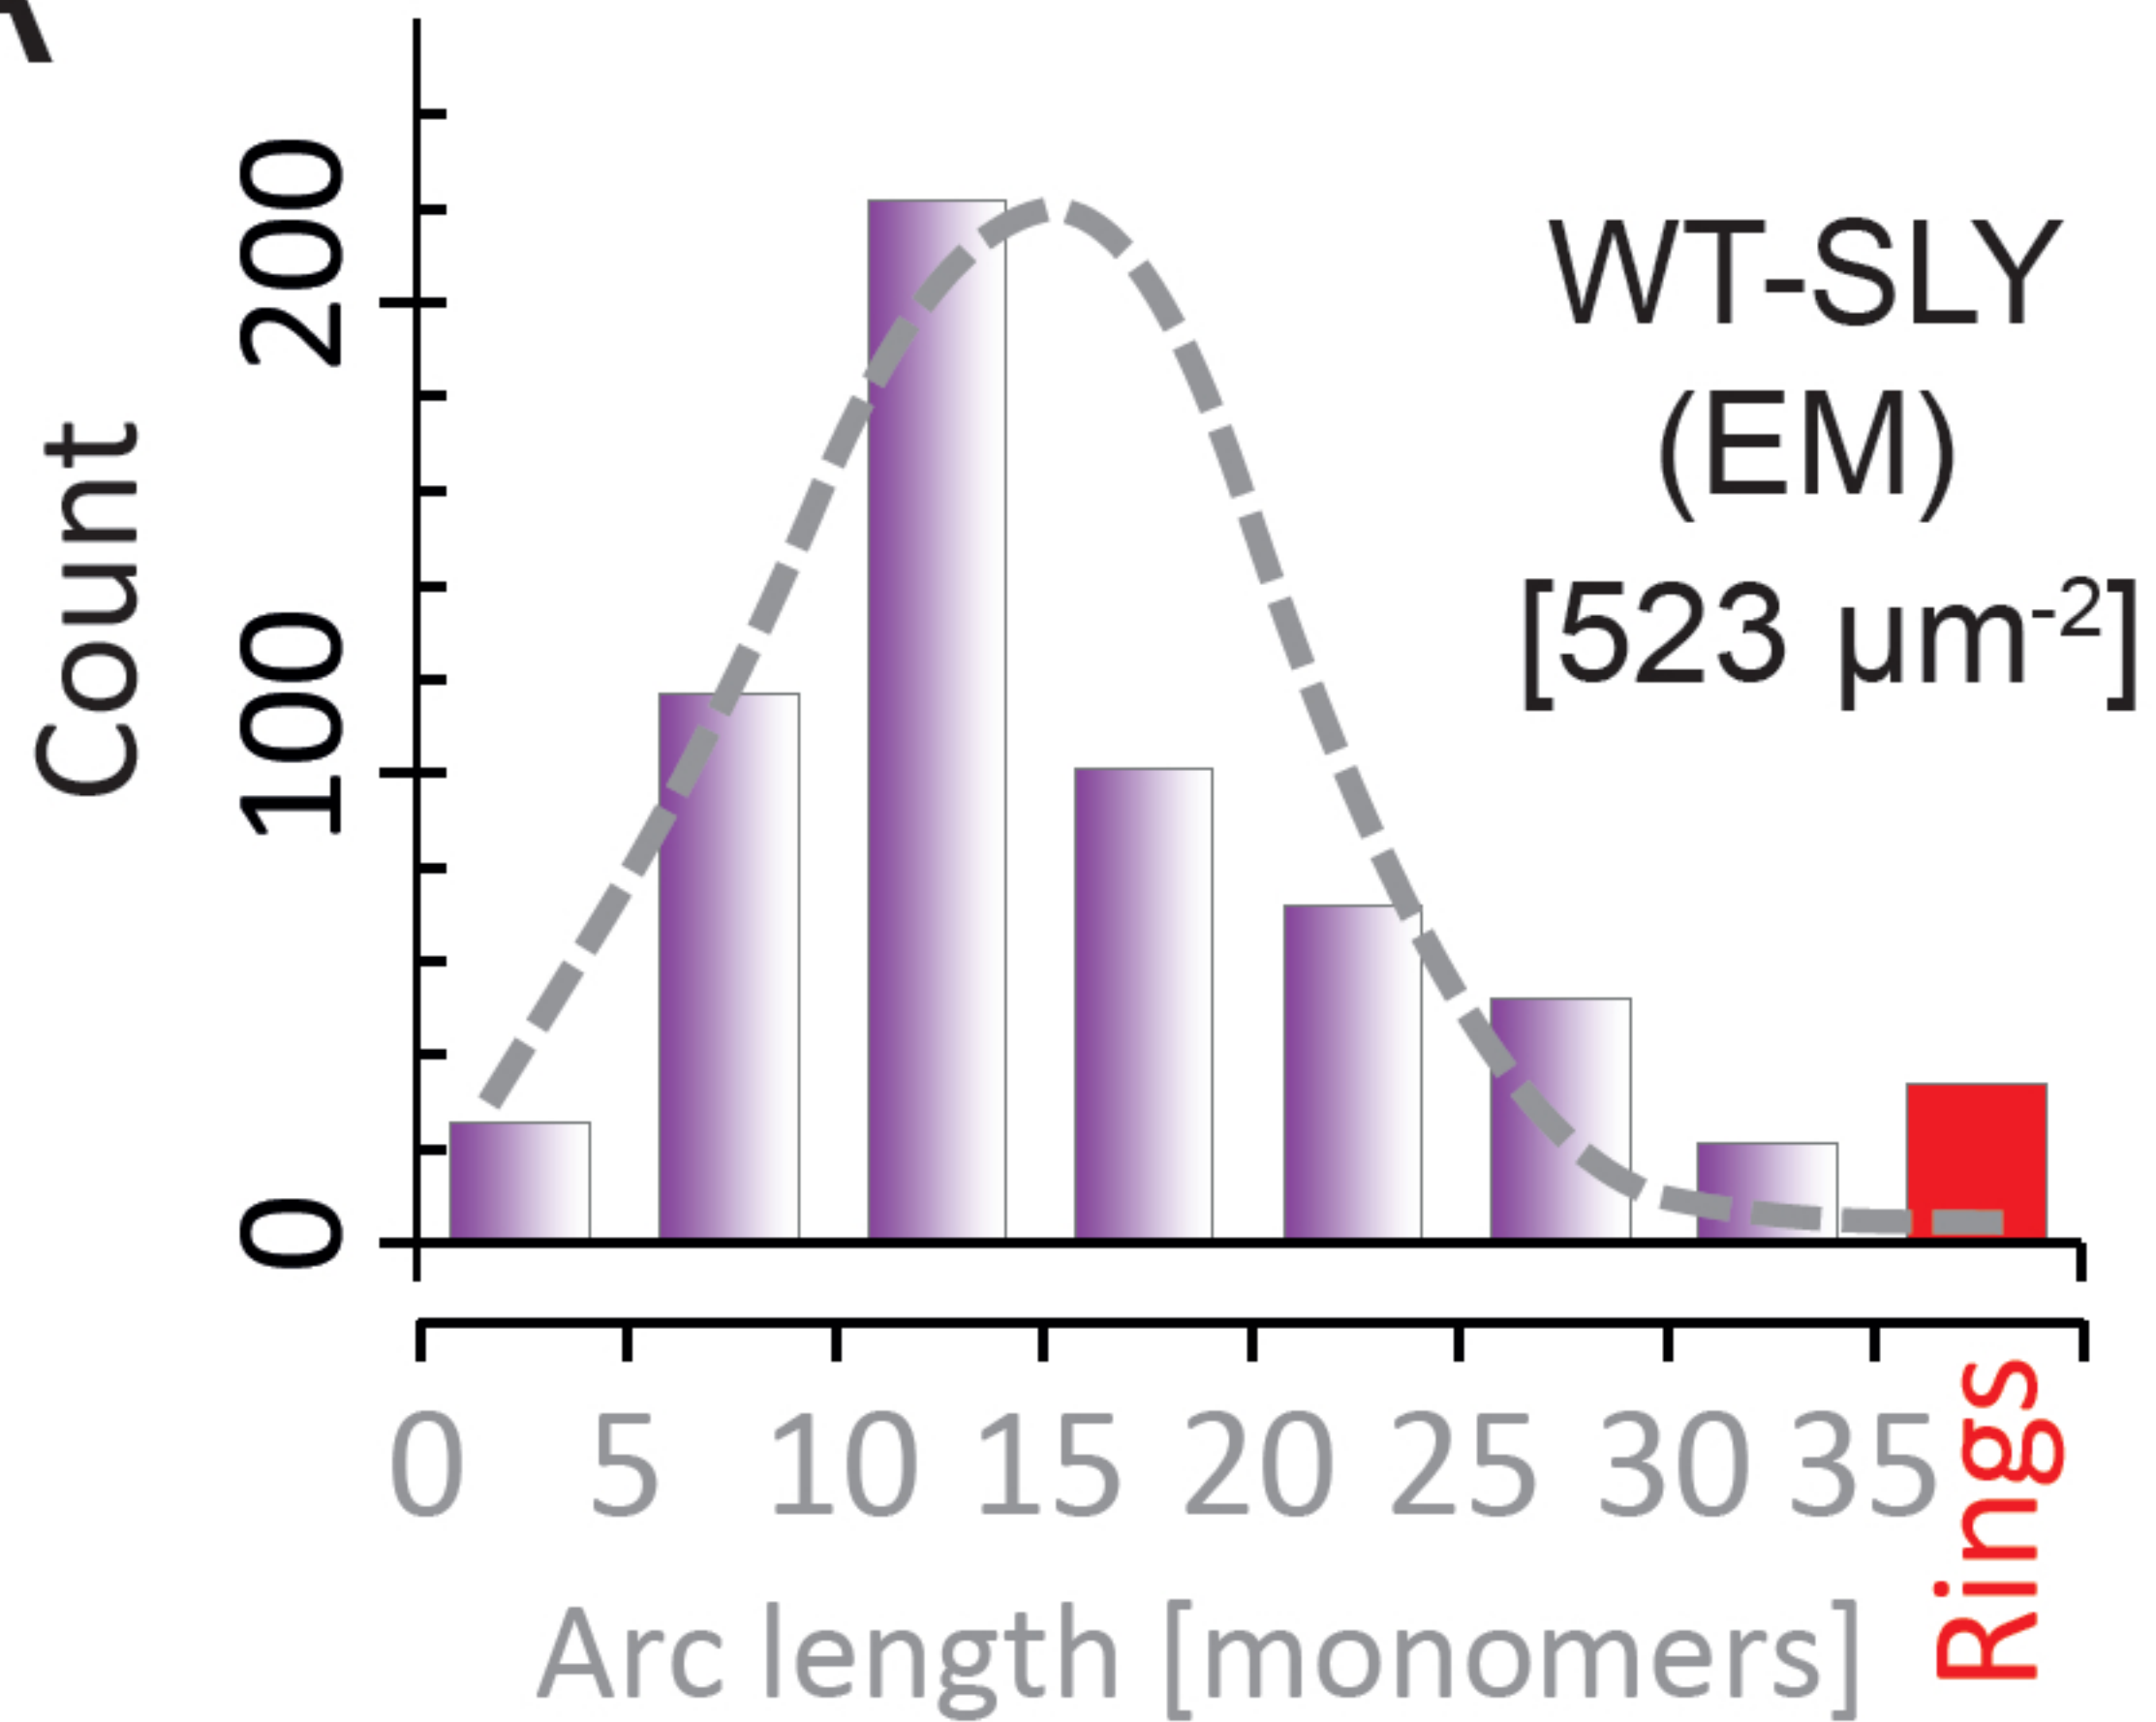

B

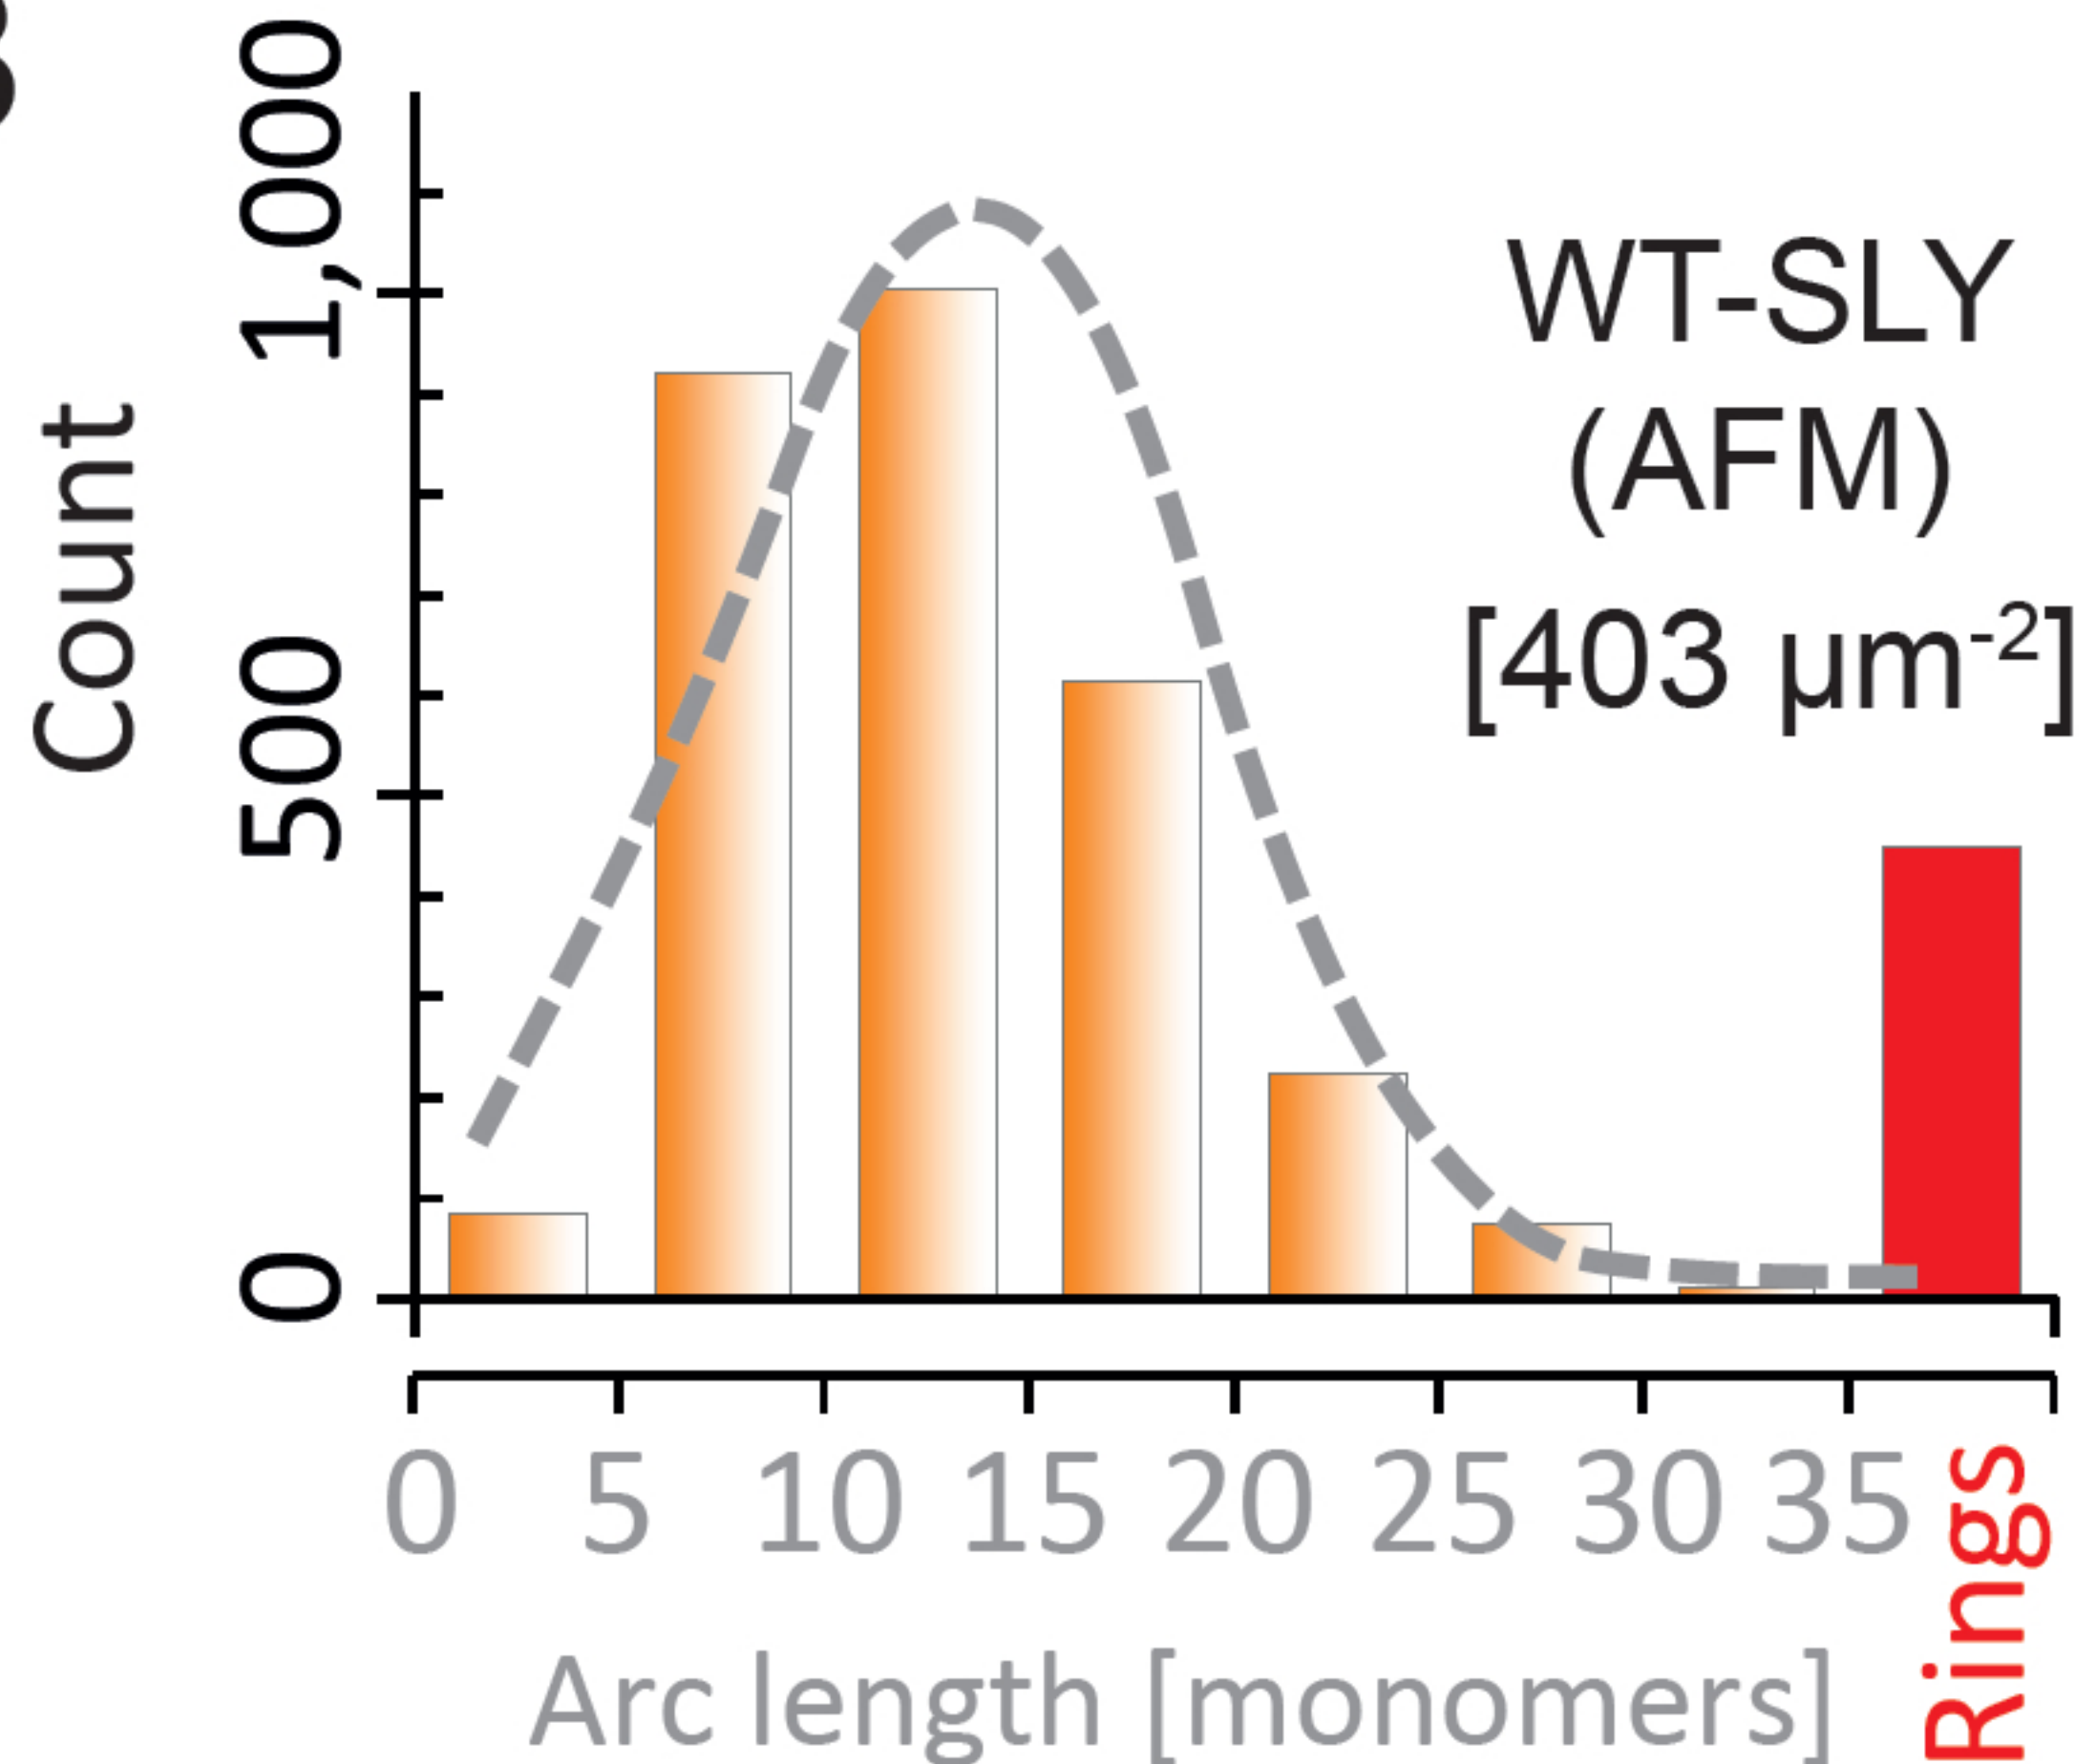

Supplement: supp [file elife-04247-supp-v1.zip › elife_poa_e04247_Figure_4_figure_supplement_1.pdf]

**A**ds-SLY  
(-DTT)

100 nm

**B**

+DTT

0 min

**C**

5 min

**D**

10 min

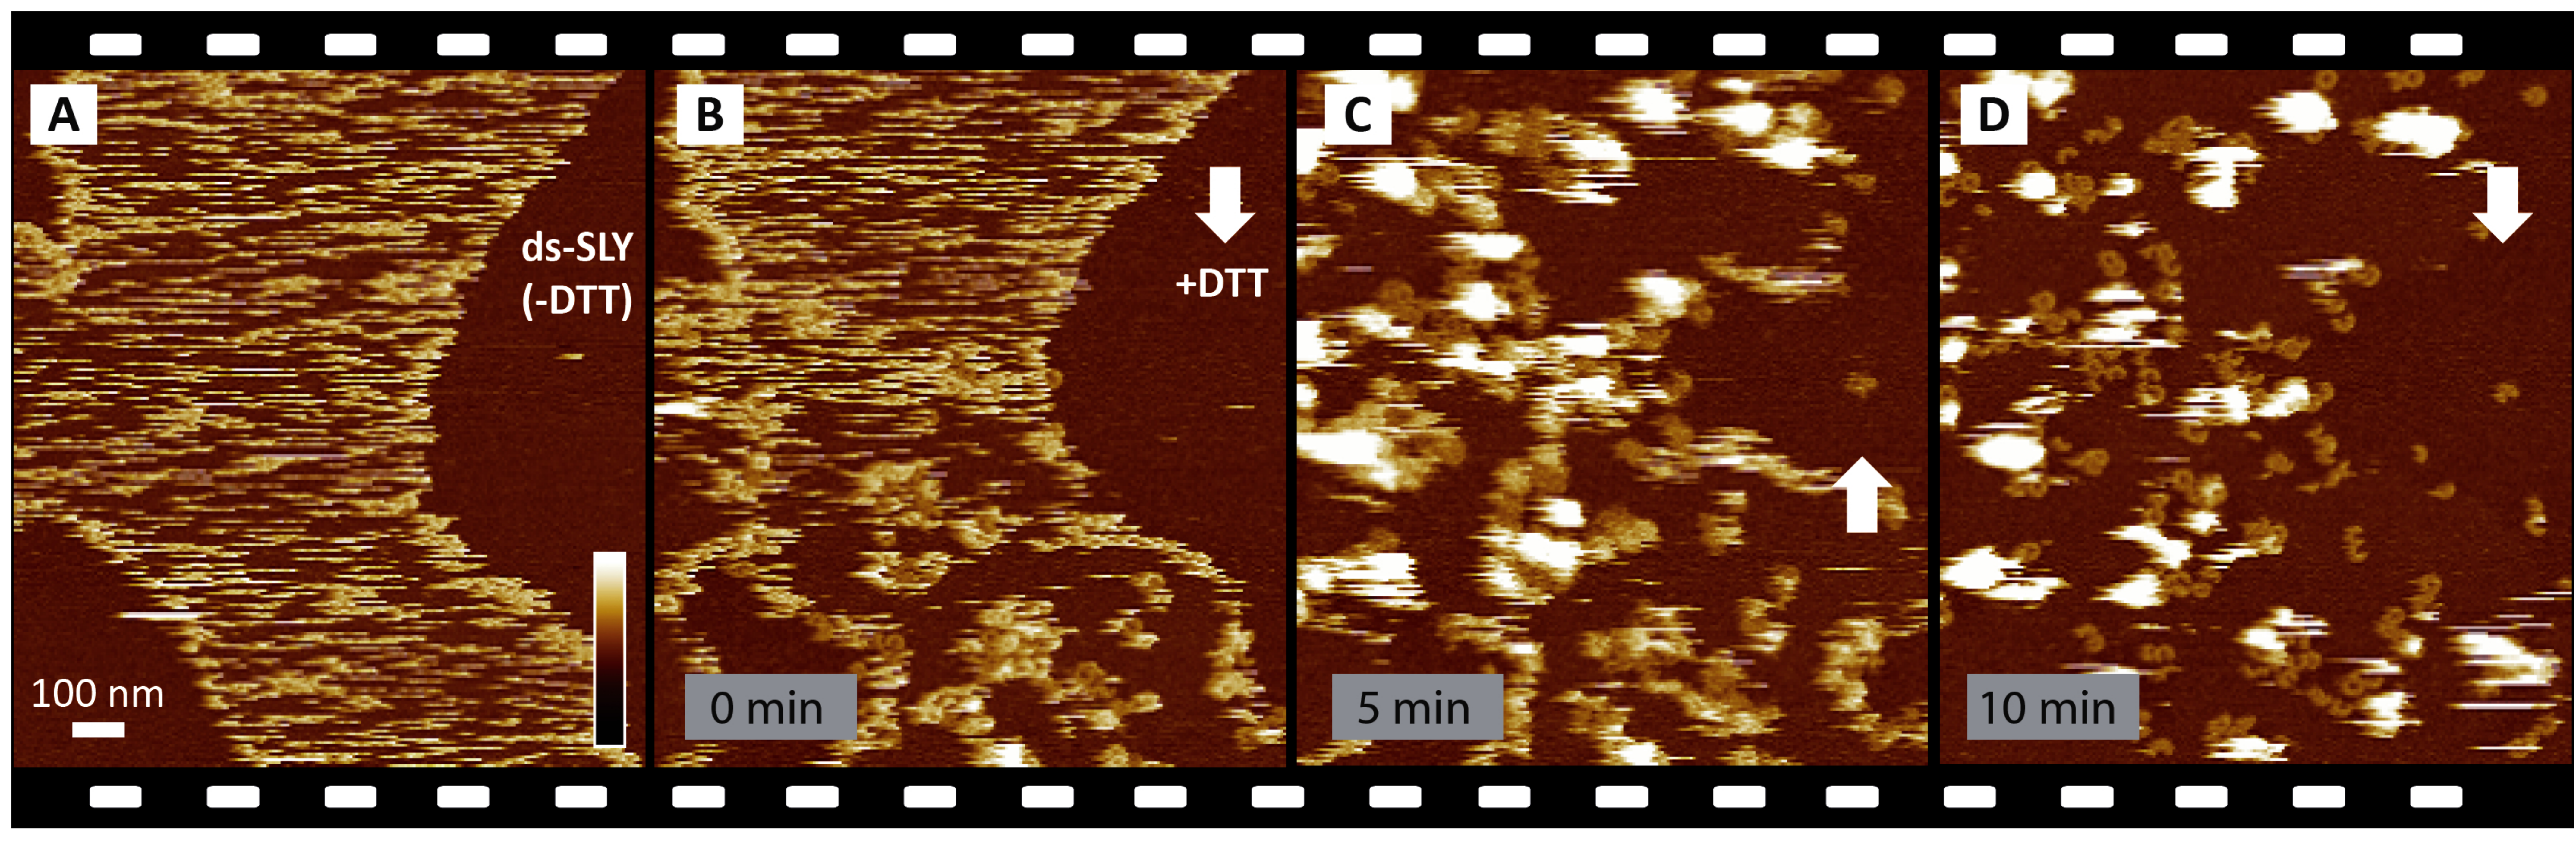

Supplement: supp [file elife-04247-supp-v1.zip › elife_poa_e04247_Figure_3_figure_supplement_1.pdf]

A

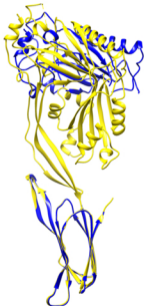

B

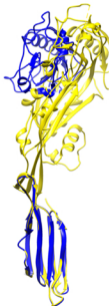

Supplement: supp [file elife-04247-supp-v1.zip › elife_poa_e04247_Figure_1_figure_supplement_4.pdf]

**A****prepore**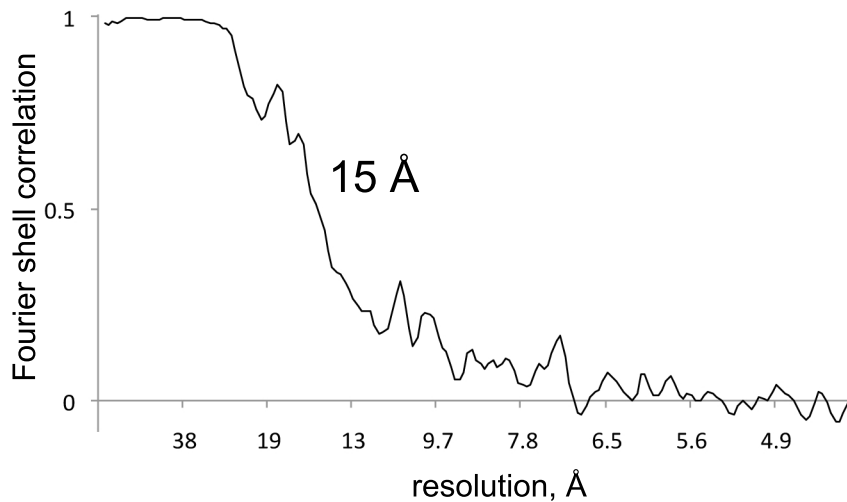**B****pore**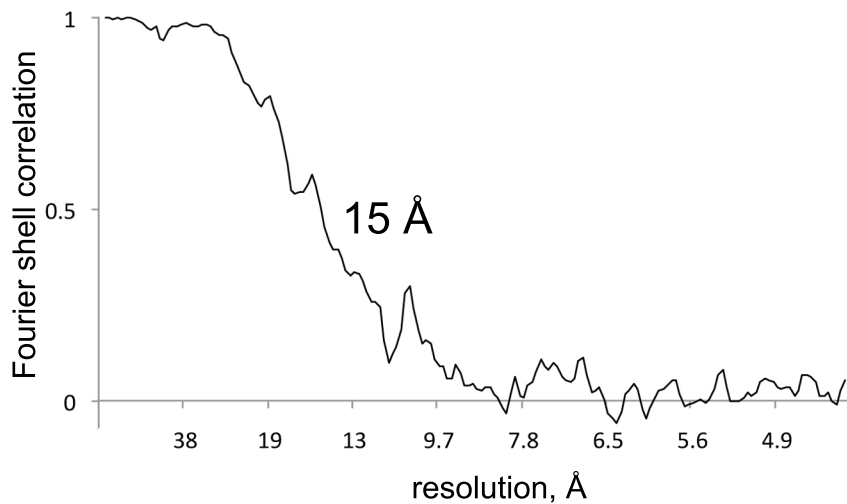

Supplement: supp [file elife-04247-supp-v1.zip › elife_poa_e04247_Figure_1_figure_supplement_2.pdf]

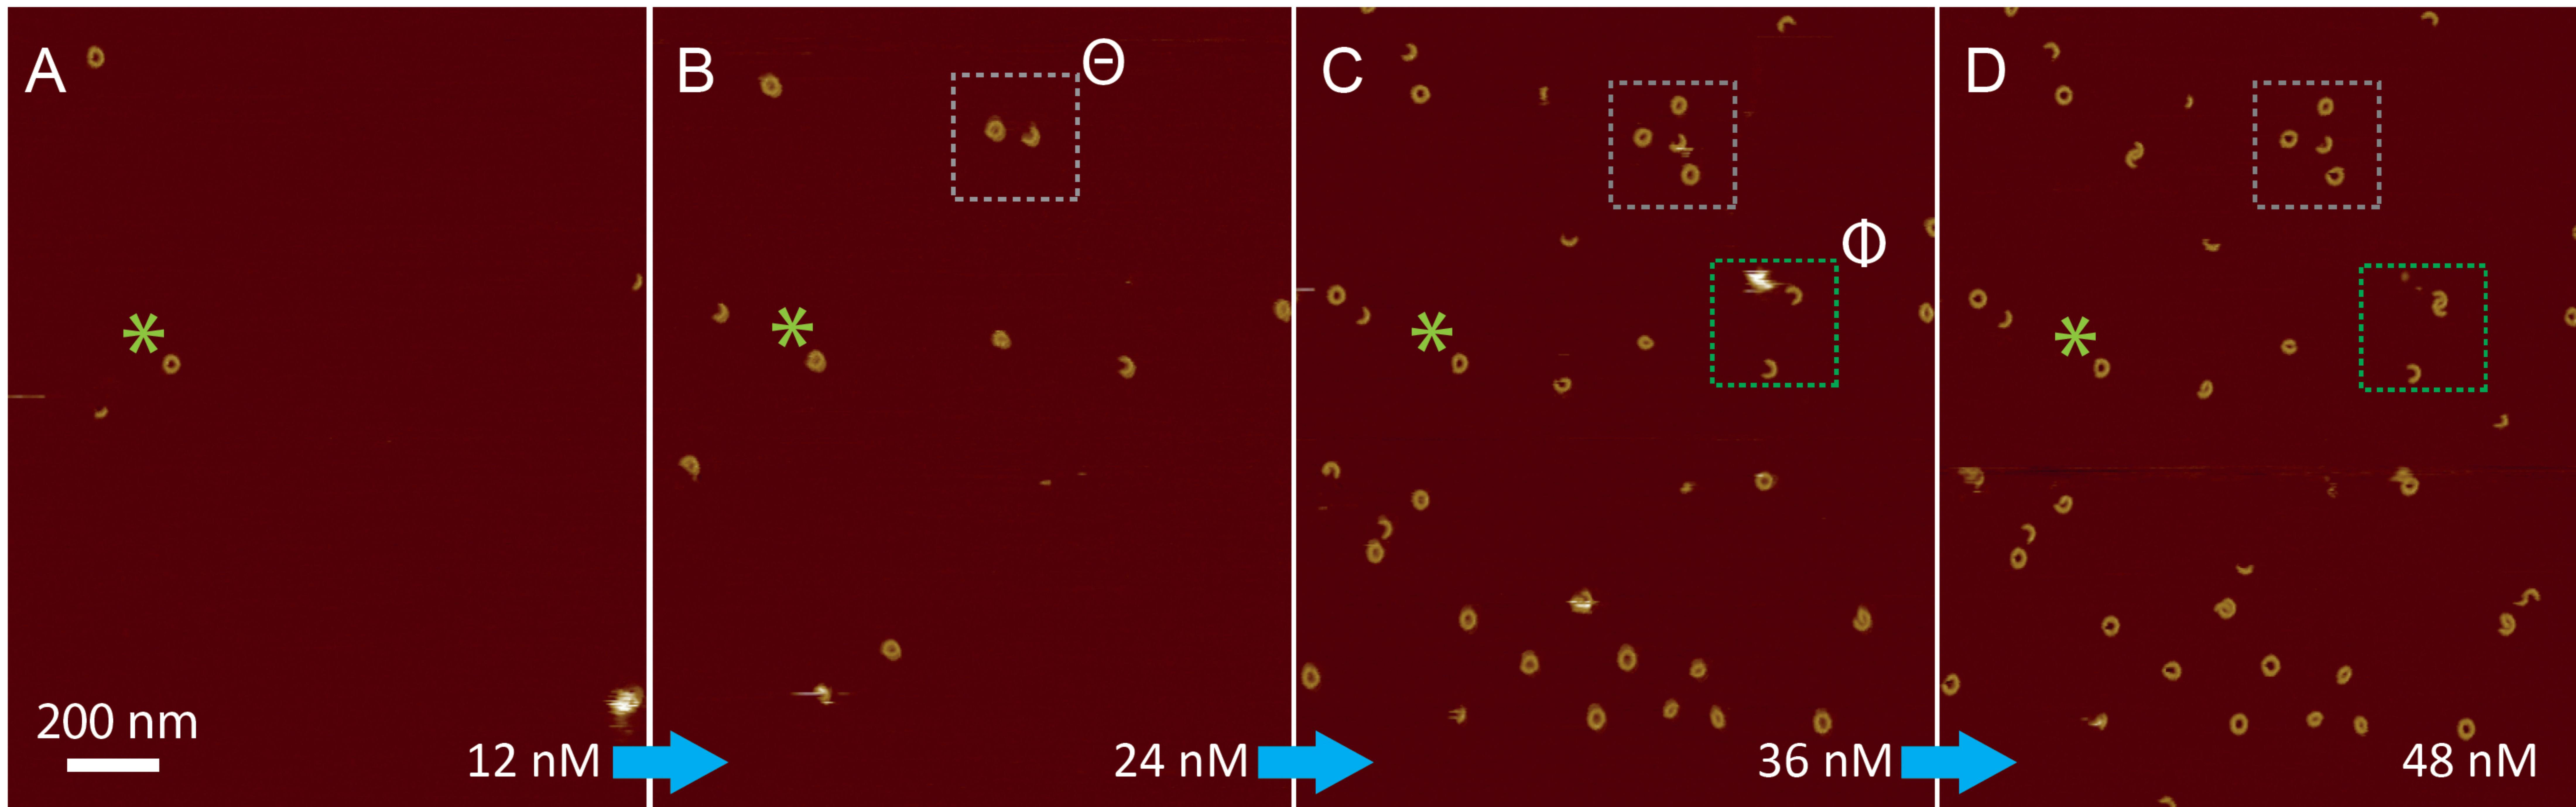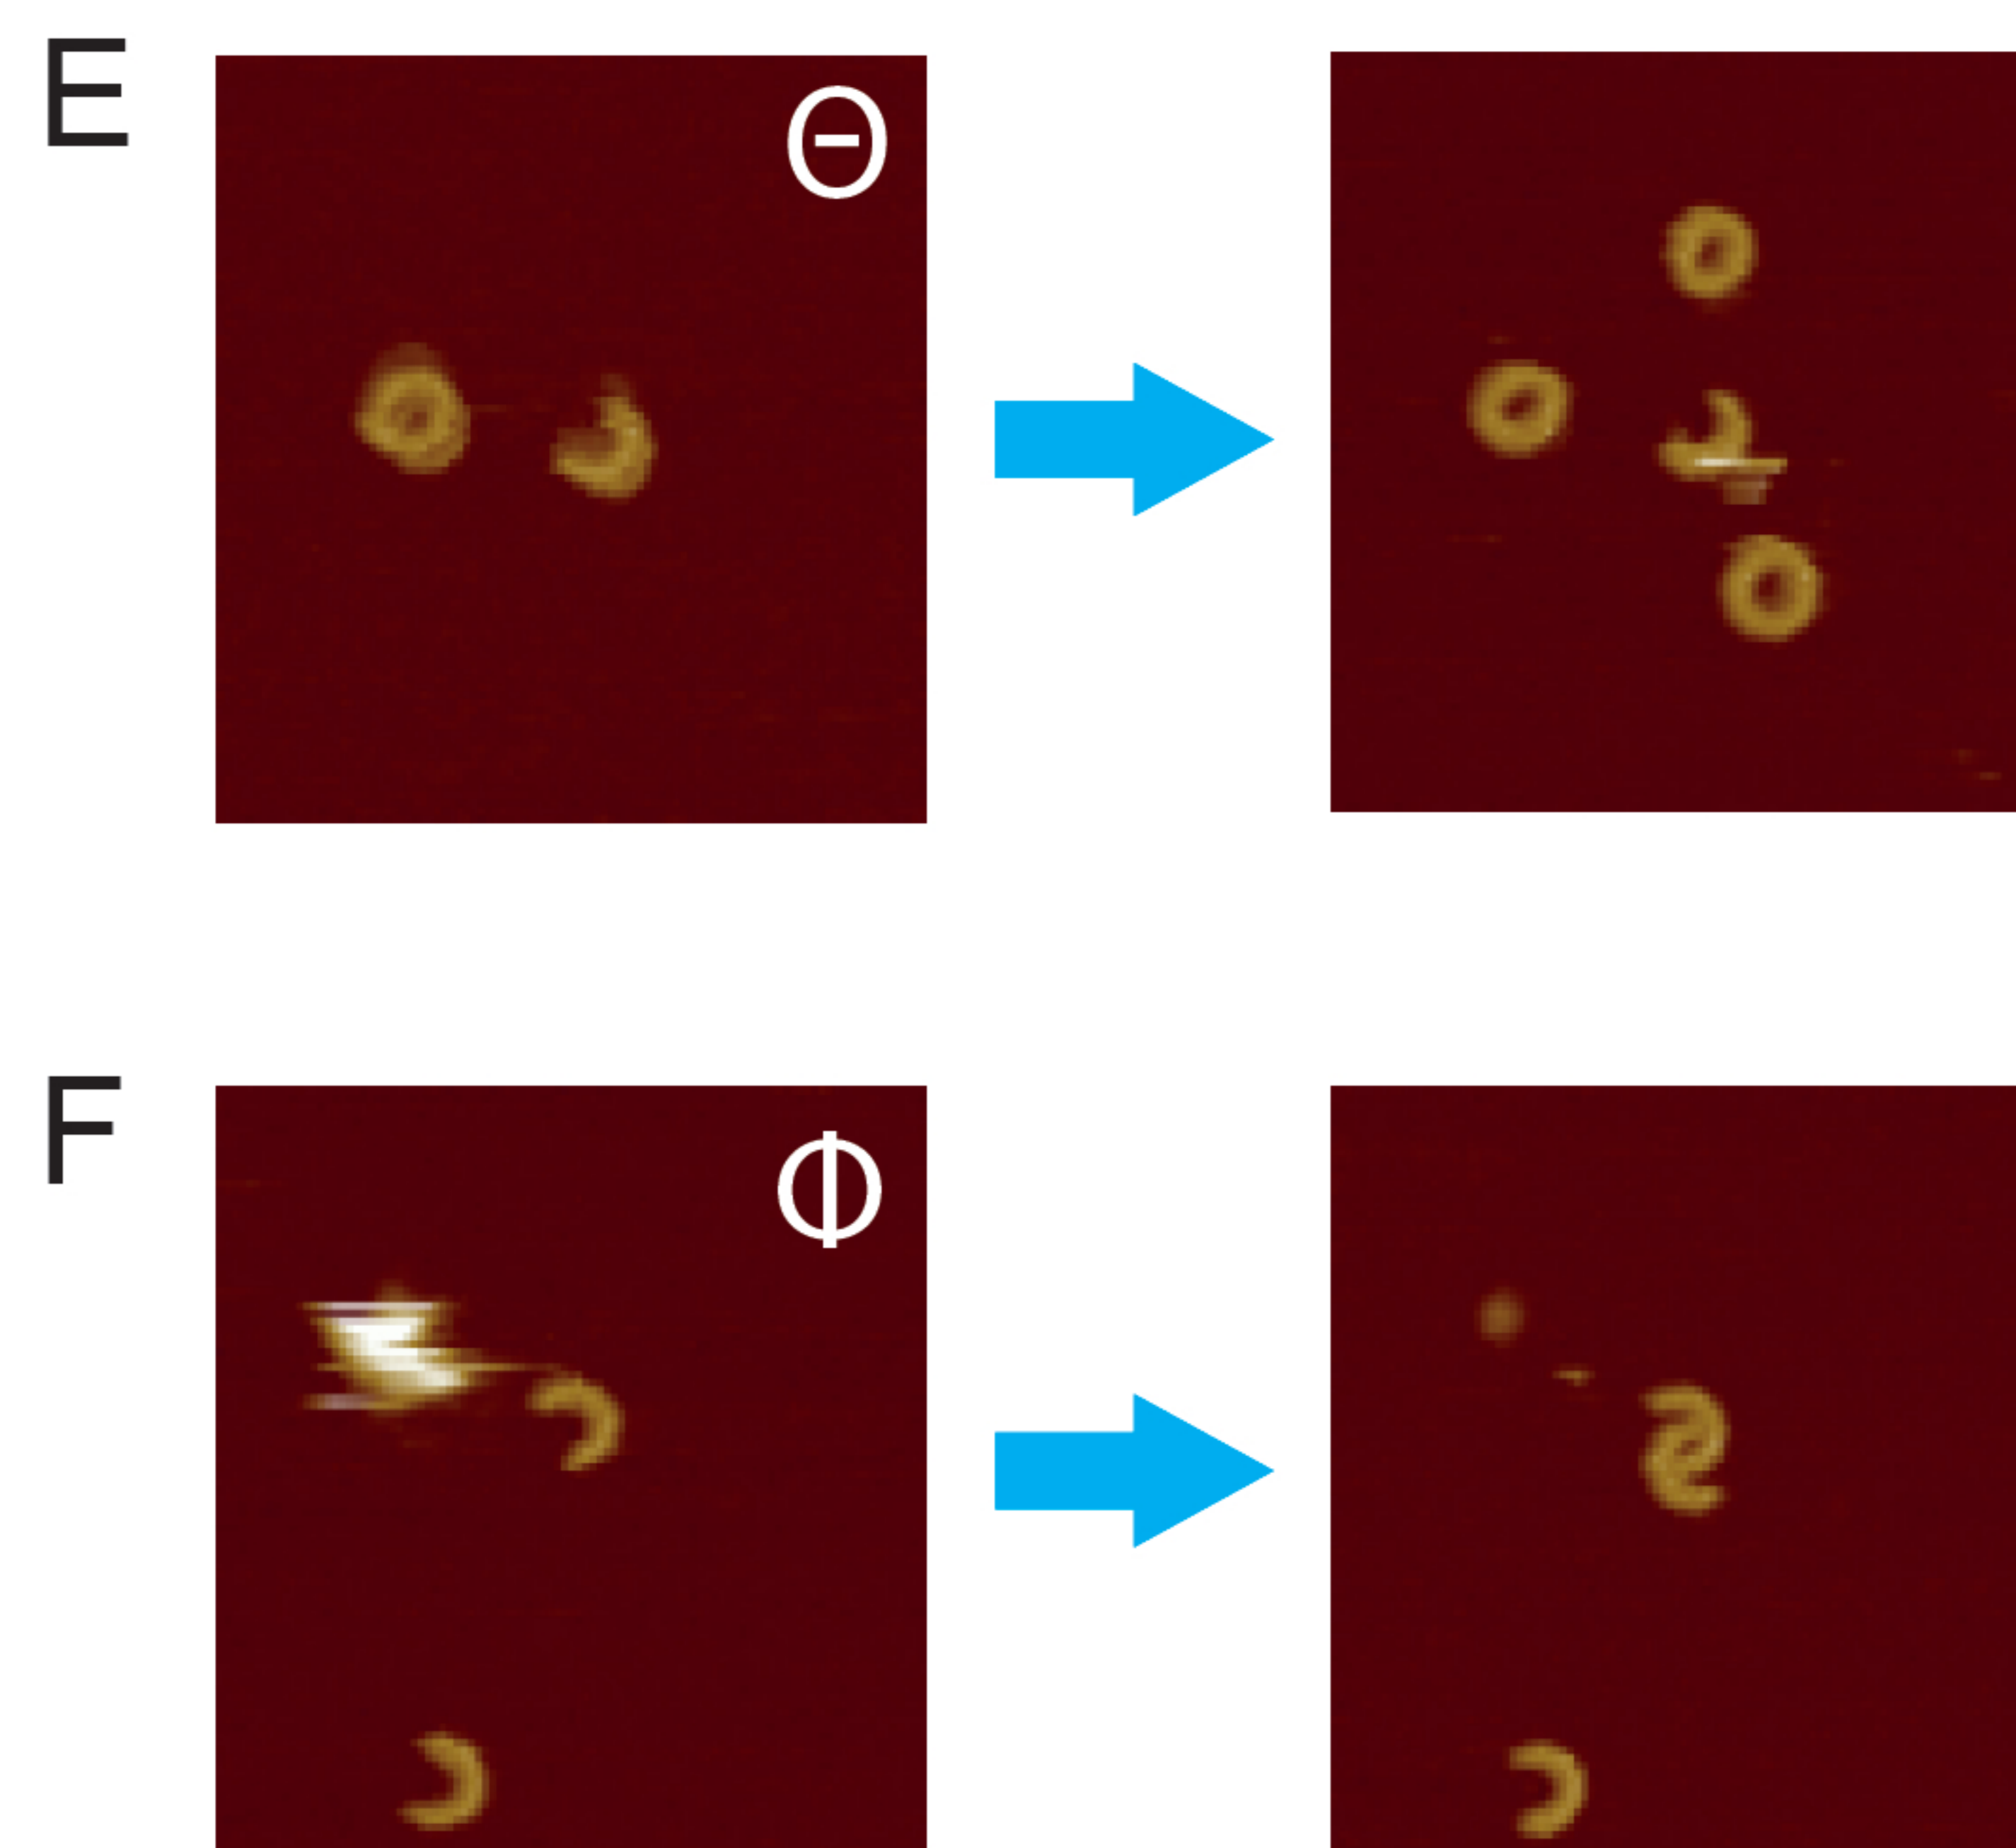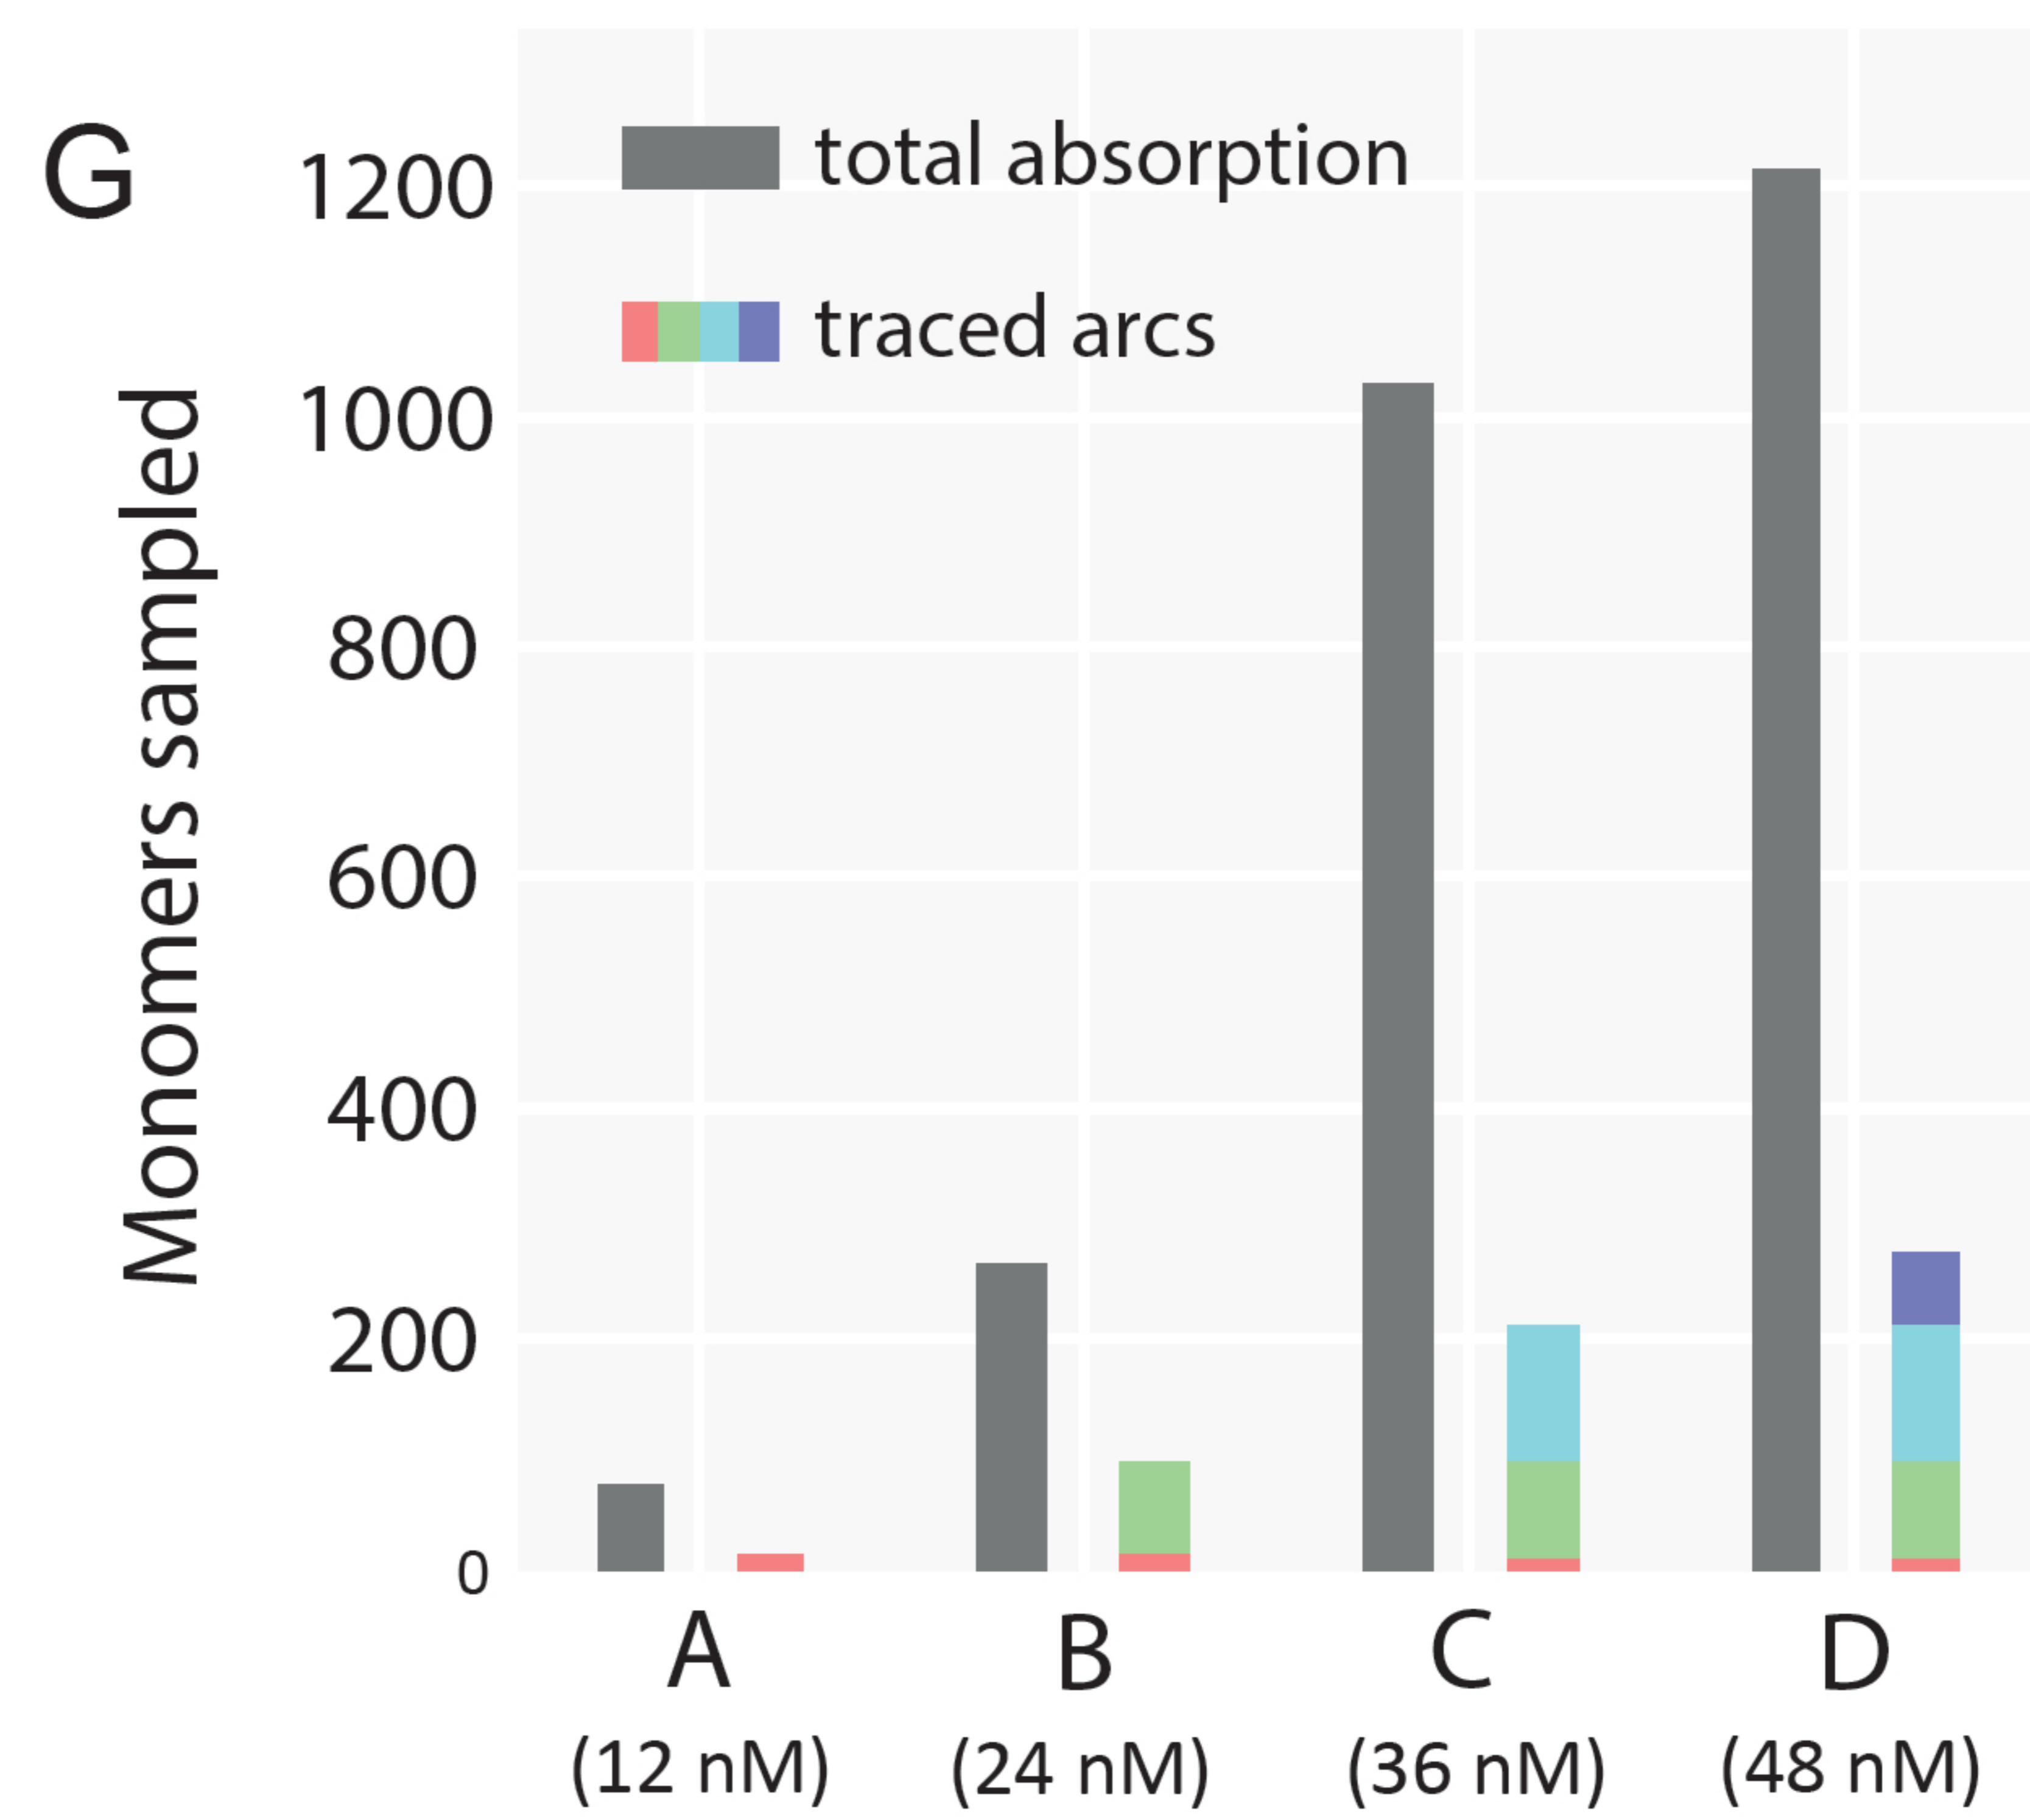

Supplement: supp [file elife-04247-supp-v1.zip › elife_poa_e04247_Figure_5_figure_supplement_1.pdf]

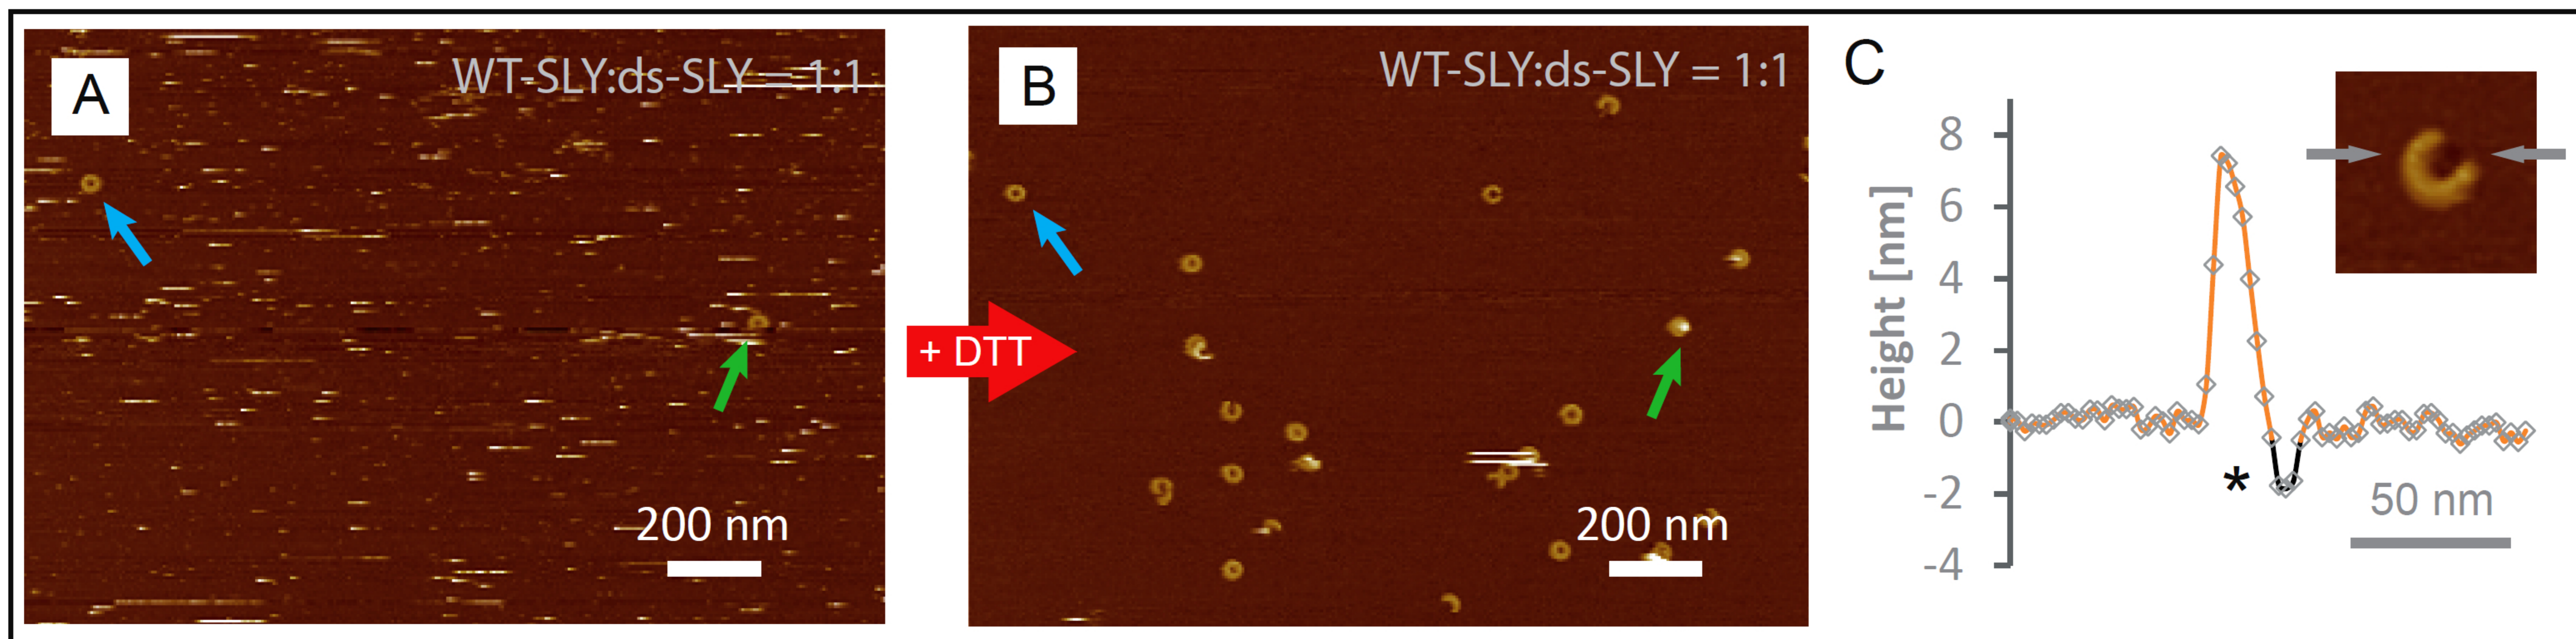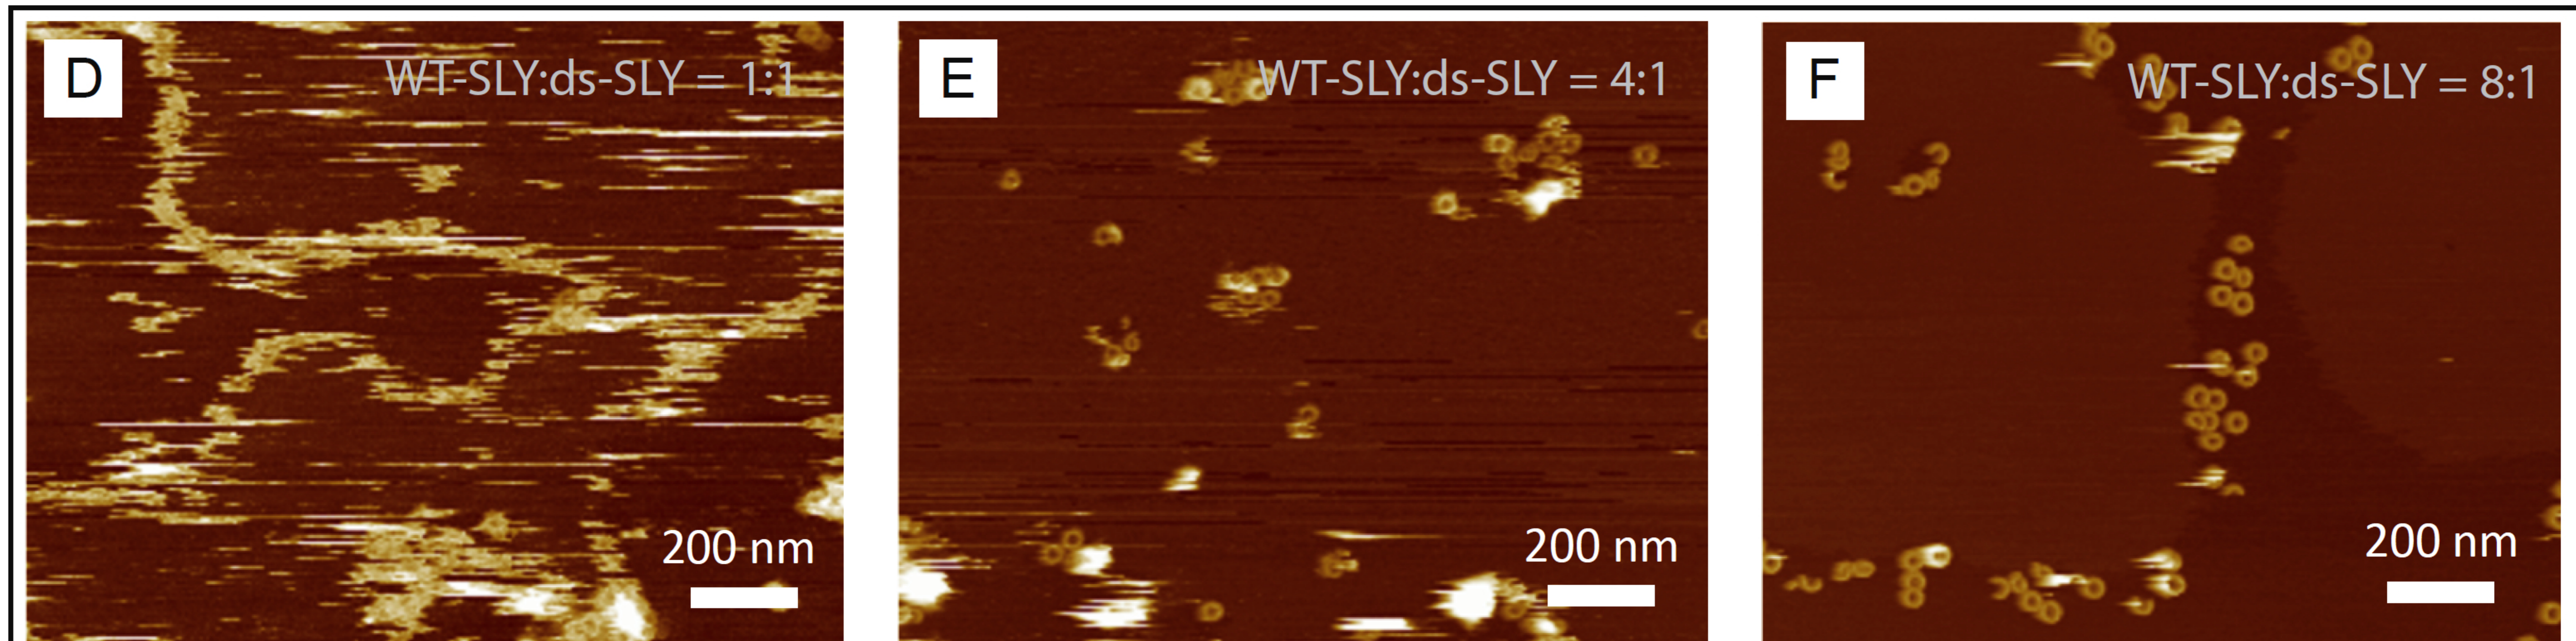

Supplement: supp [file elife-04247-supp-v1.zip › elife_poa_e04247_Figure_4_figure_supplement_3.pdf]

Complementary face 1

Complementary face 2

A

10

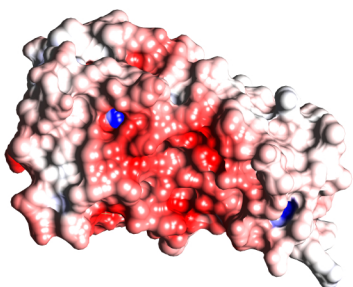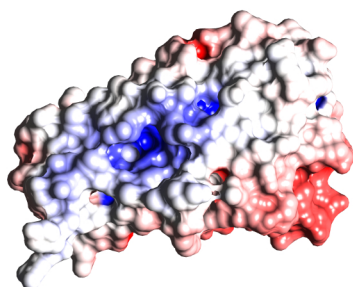

-10

B

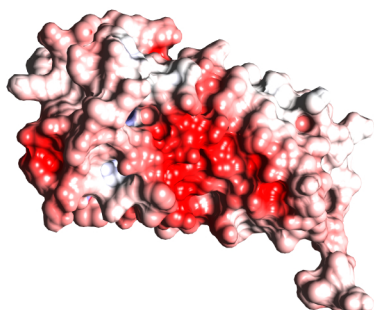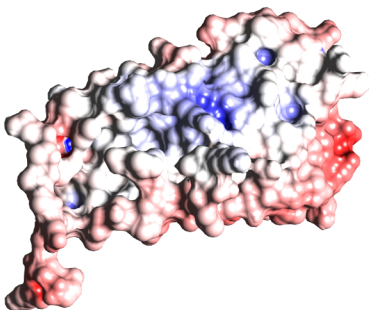

C

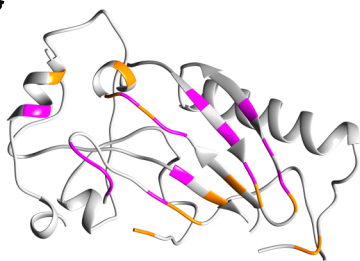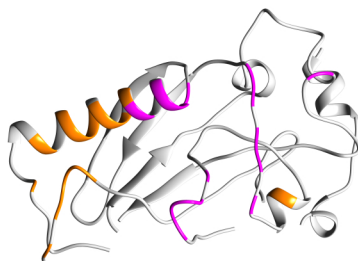

D

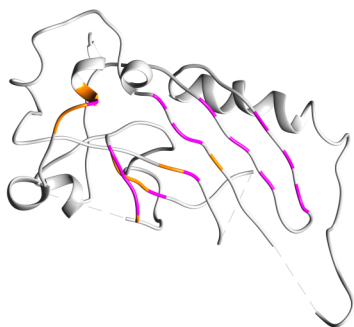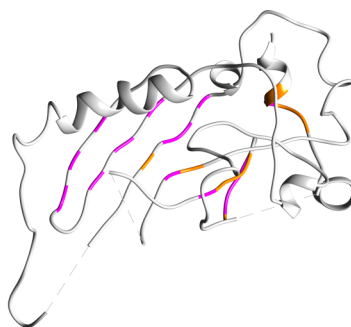

Supplement: supp [file elife-04247-supp-v1.zip › elife_poa_e04247_Figure_1_figure_supplement_3.pdf]
